# Supplementary material for: TBK1‐mediated phosphorylation of LC3C and GABARAP‐L2 controls autophagosome shedding by ATG4 protease
Source: PubMed Central journal article supplement (PMC6945063; doi:10.15252/embr.201948317), 2019-11-11

**Fig. 1A**

*in vitro* kinase assay

$\gamma$ -<sup>32</sup>P ATP, GST-TBK1

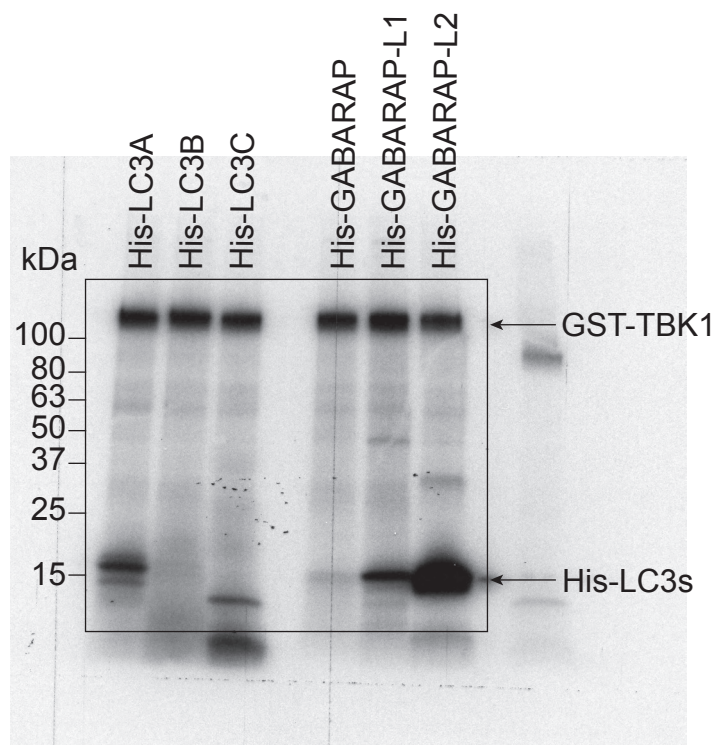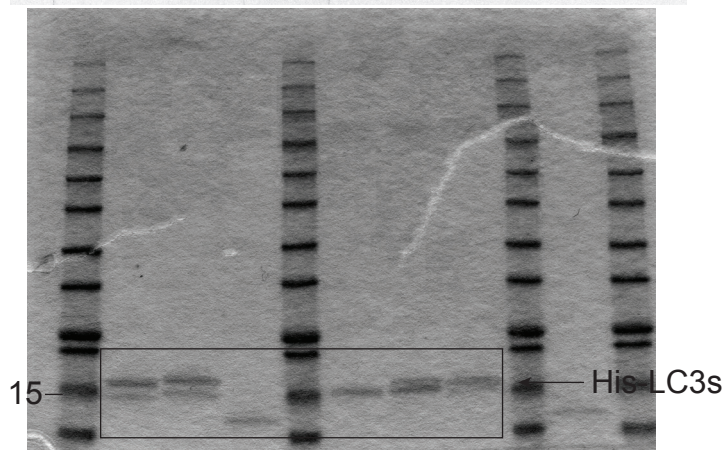

# Fig 1B

## LC3A pS29

Raw File Scan Method Score m/z Gene names  
20151106\_LH\_A 10205 ITMS; CID 128.82 806.93 MAP1LC3A

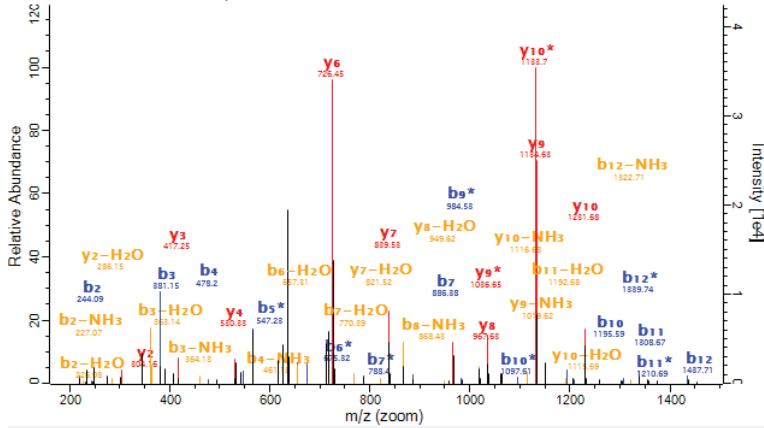

- D Q I H P **Y10** **Y9** **Y8** **Y7** **Y6** **Y2**  
b2 b3 b4 b5\* b6\* b7\* b8\* b9 b10 b11 b12

## LC3A pS61

Raw File Scan Method Score m/z Gene names  
20151106\_LH\_A 11682 ITMS; CID 52.79 575.28 MAP1LC3A

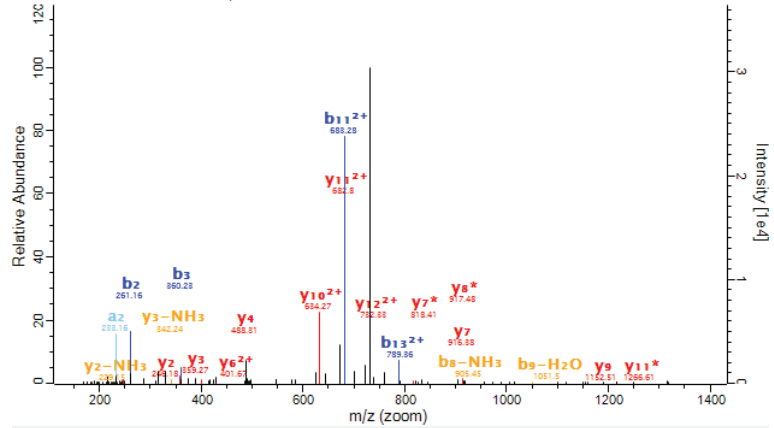

- F L V P D H V N **Y122+** **Y112+** **Y102+** **Y9** **Y8\*** **Y7** **Y62+** **Y5** **Y4** **Y3** **Y2**  
b2 b3 b112+ b122+

## LC3C pT48

Raw File Scan Method Score m/z Gene names  
20151106\_LH\_C 11704 ITMS; CID 166.79 724.83 MAP1LC3C

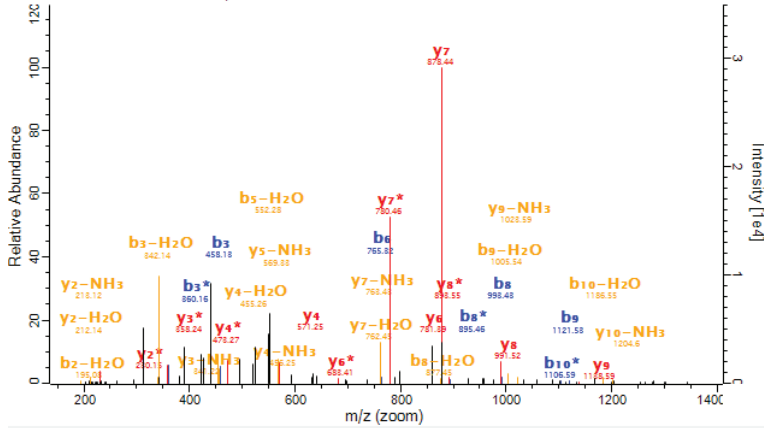

- E **Y9** **Y8** **Y7** **Y6** **Y4** **Y3\*** **Y2\***  
b3 b4 b5 b6 b7 b8 b9 b10\*

## LC3C pT56

Raw File Scan Method Score m/z Gene names  
20151106\_LH\_C 11704 ITMS; CID 166.79 724.83 MAP1LC3C

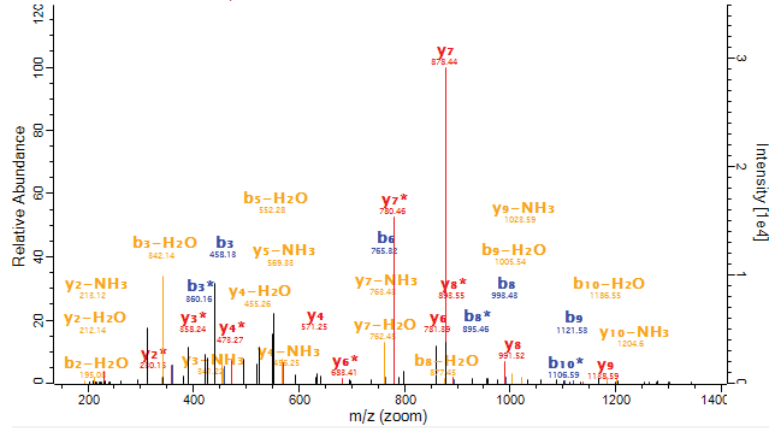

- E **Y9** **Y8** **Y7** **Y6** **Y4** **Y3\*** **Y2\***  
b3 b4 b5 b6 b7 b8 b9 b10\*

## LC3C pS93

Raw File Scan Method Score m/z Gene names  
20151106\_LH\_C 12555 ITMS; CID 300.49 819.87 MAP1LC3C

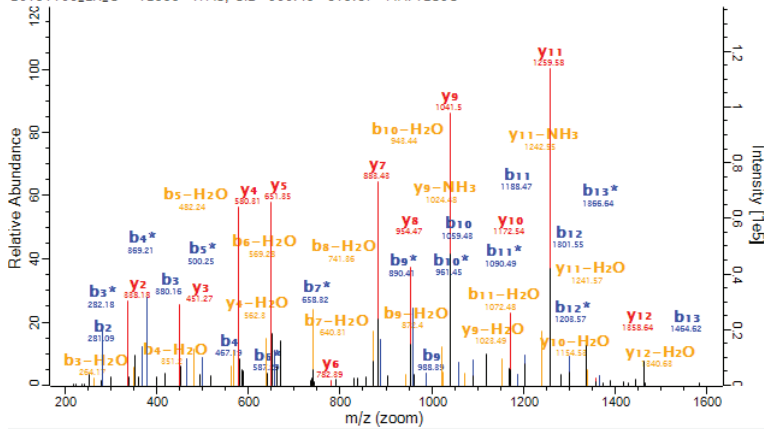

- **Y12** **Y11** **Y10** **Y9** **Y8** **Y7** **Y6** **Y5** **Y4** **Y3** **Y2**  
b2 b3 b4 b5\* b6\* b7\* b8 b9 b10 b11 b12 b13

## LC3C pS96

Raw File Scan Method Score m/z Gene names  
20151106\_LH\_C 11469 ITMS; CID 172.1 835.87 MAP1LC3C

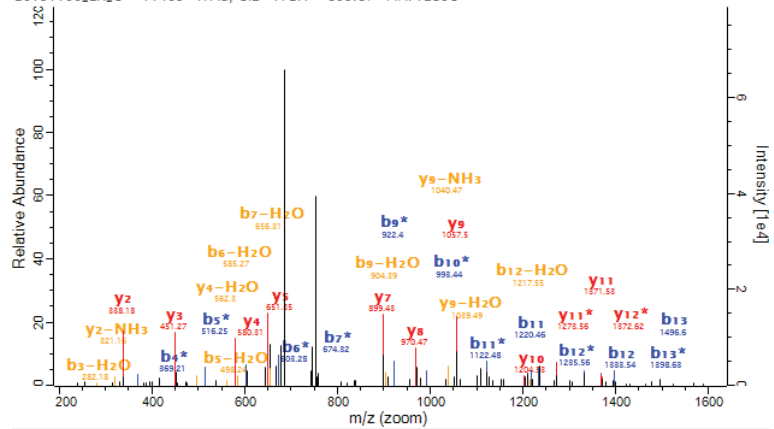

- **Y12\*** **Y11** **Y10** **Y9** **Y8** **Y7** **Y6** **Y5** **Y4** **Y3** **Y2**  
b2 b3 b4 b5\* b6\* b7\* b8 b9 b10\* b11 b12 b13

# Fig 1B

## GABARAP-L1 pY25

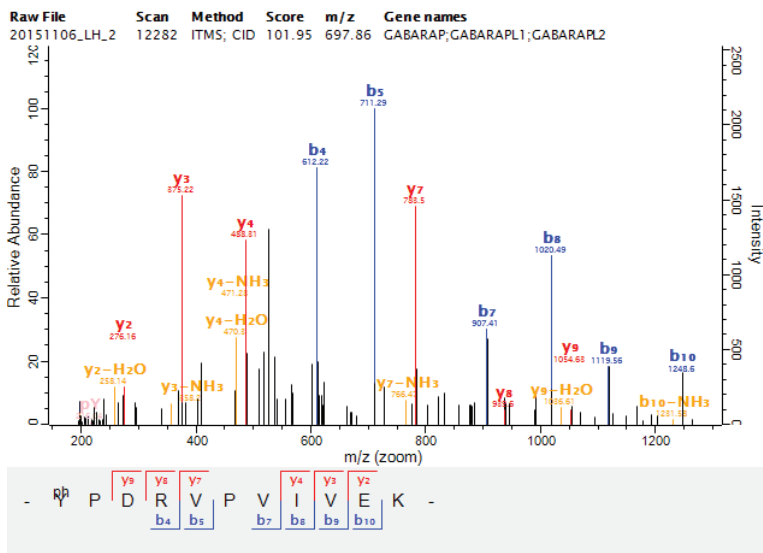

## GABARAP-L2 pS10

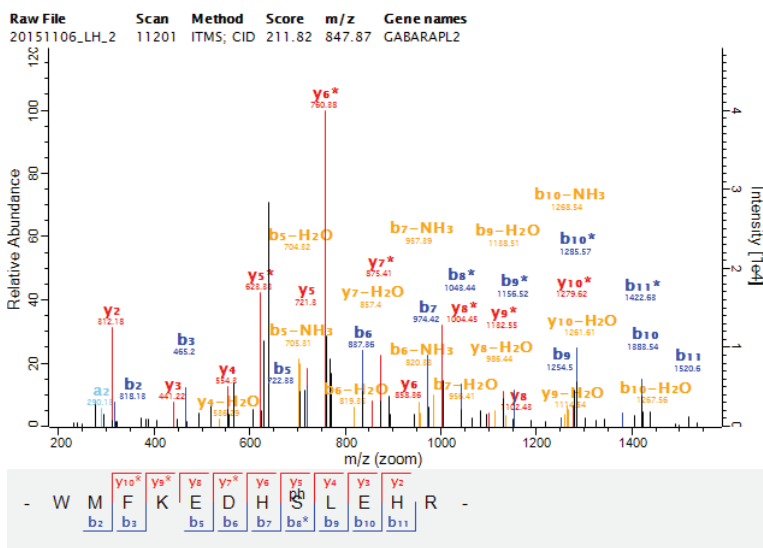

## GABARAP-L2 pS39

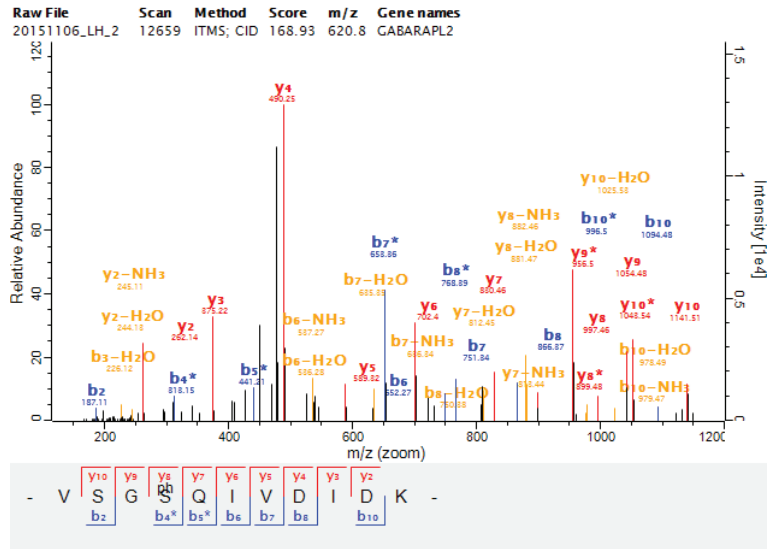

## GABARAP-L2 pS87

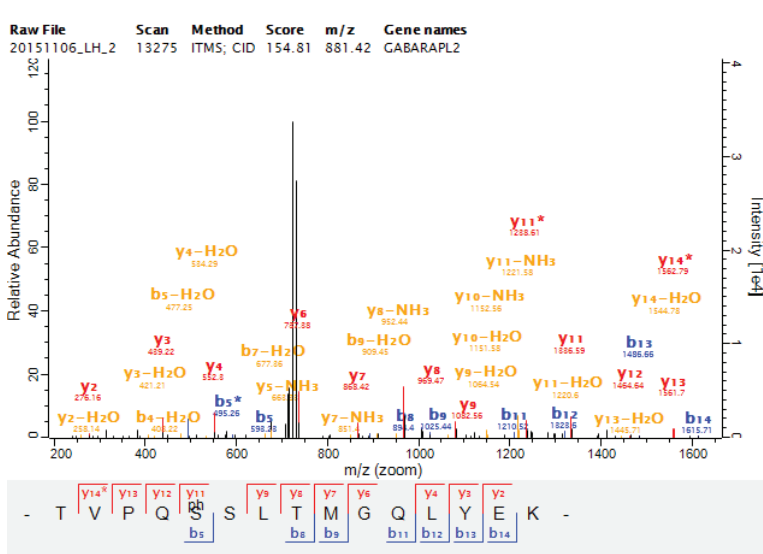

## GABARAP-L2 pS88

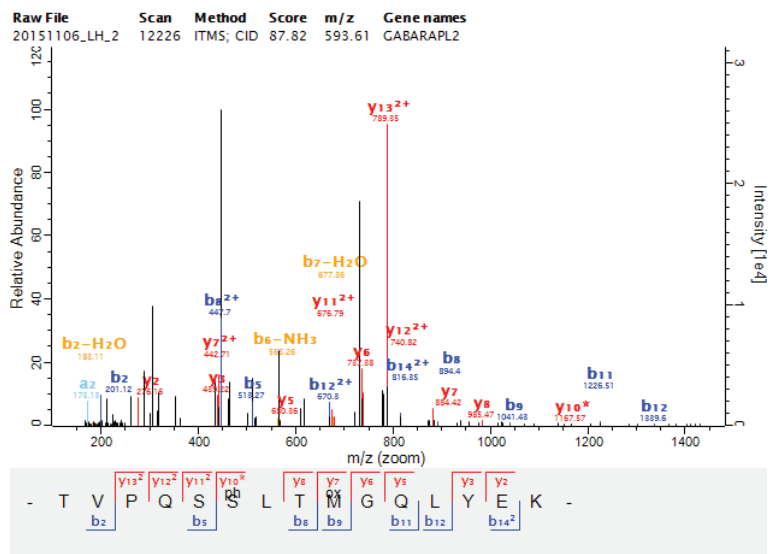

Supplement: EMBR-21-e48317-s007.pdf [file EMBR-21-e48317-s007.pdf]
