# Supplementary material for: TBK1‐mediated phosphorylation of LC3C and GABARAP‐L2 controls autophagosome shedding by ATG4 protease
Source: PubMed Central journal article supplement (PMC6945063; doi:10.15252/embr.201948317), 2019-11-11

Fig 2A

### GABARAP-L2 pS10

Raw File 20160115\_LH\_L2 Scan 9248 Method ITMS; CID Score 228.17 m/z 856.87 Gene names GABARAPL2

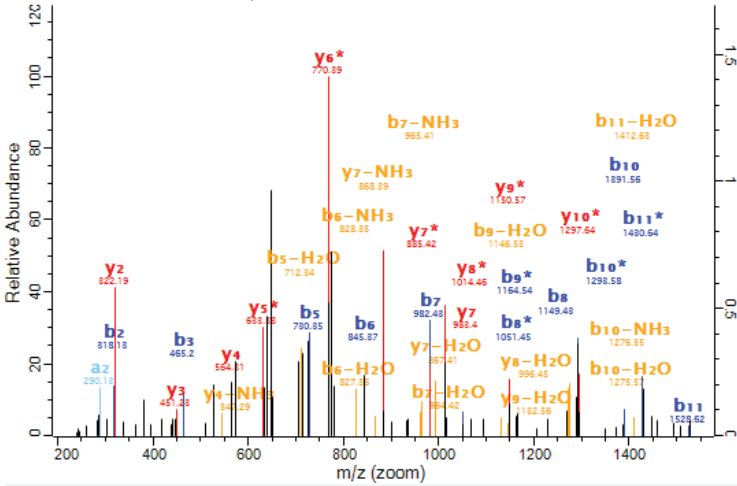

- W M F K E D H S L E H R -  
 b2 b3 b5 b6 b7 b8 b9\* b10 b11

### GABARAP-L2 pS39

Raw File 20160115\_LH\_L2 Scan 11015 Method ITMS; CID Score 147.51 m/z 624.8 Gene names GABARAPL2

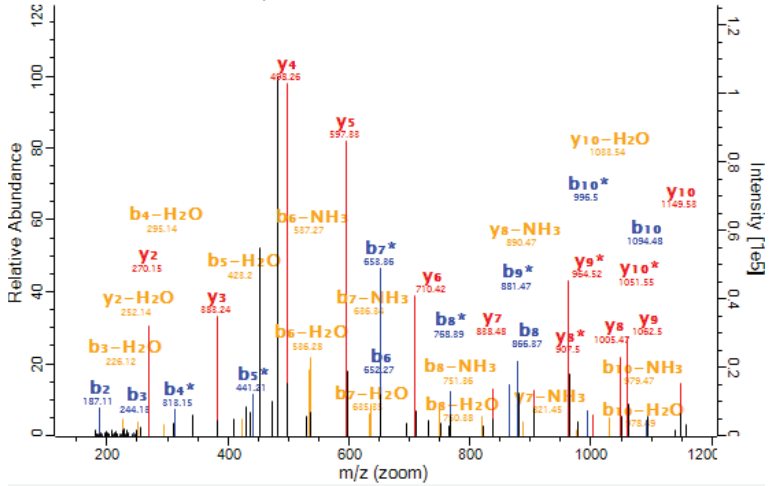

- V S G S Q I V D I D K -  
 b2 b3 b4\* b5\* b6 b7\* b8 b9\* b10

### GABARAP-L2 pS87

Raw File 20160115\_LH\_L2 Scan 10607 Method ITMS; CID Score 140.96 m/z 889.41 Gene names GABARAPL2

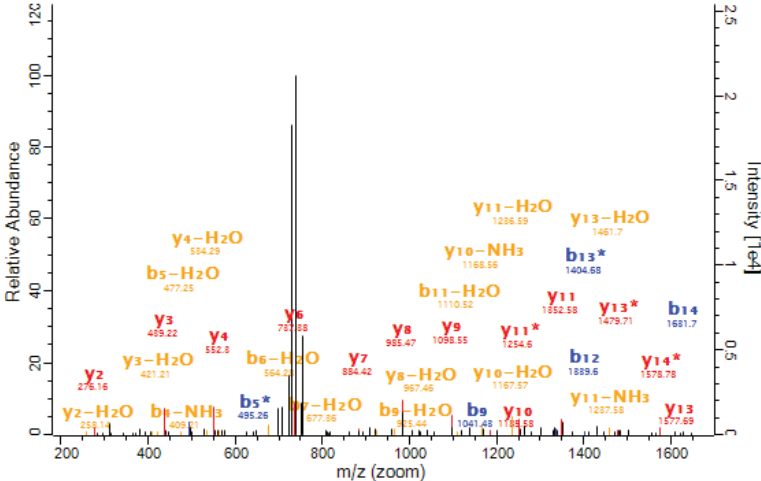

- T V P Q S L T M G Q L Y E K -  
 b5\* b9 b12 b13\* b14

### GABARAP-L2 pS88

Scan number 10456 Raw File 20160115\_LH\_L2 Method ITMS; CID Gene names GABARAPL2

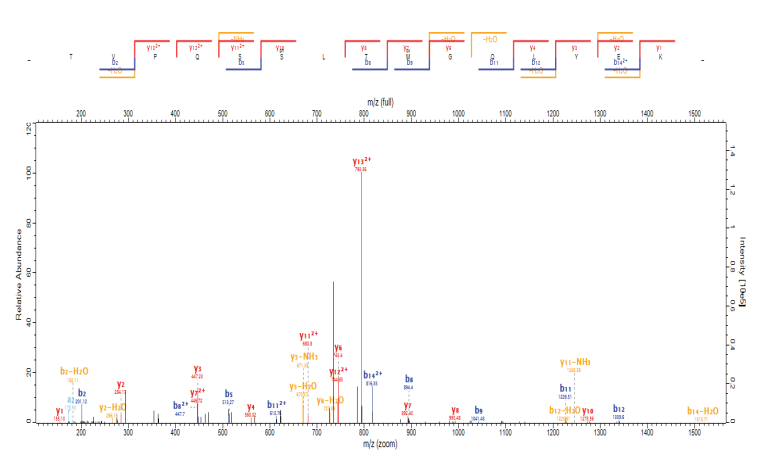

- T V P Q S L T M G Q L Y E K -  
 b5\* b9 b12 b13\* b14

# Fig 2A

## LC3C pS93

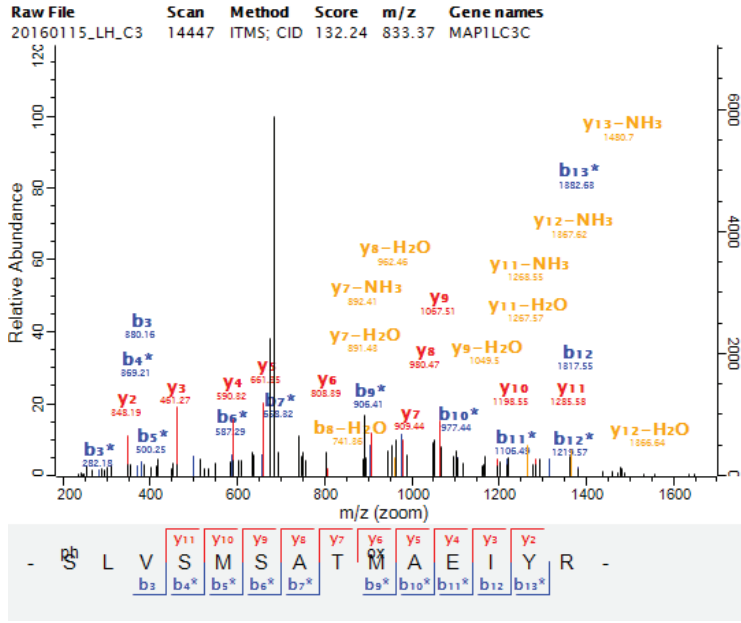

## LC3C pS96

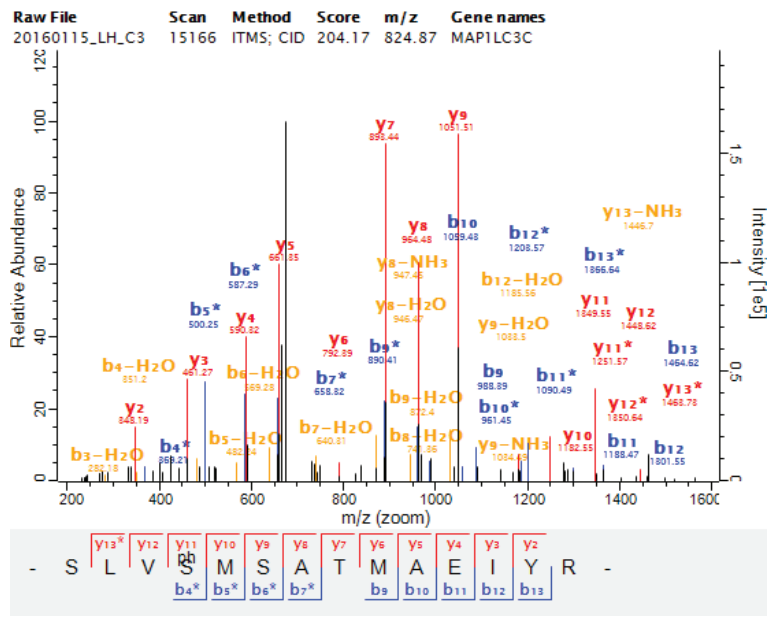

## LC3C pS98

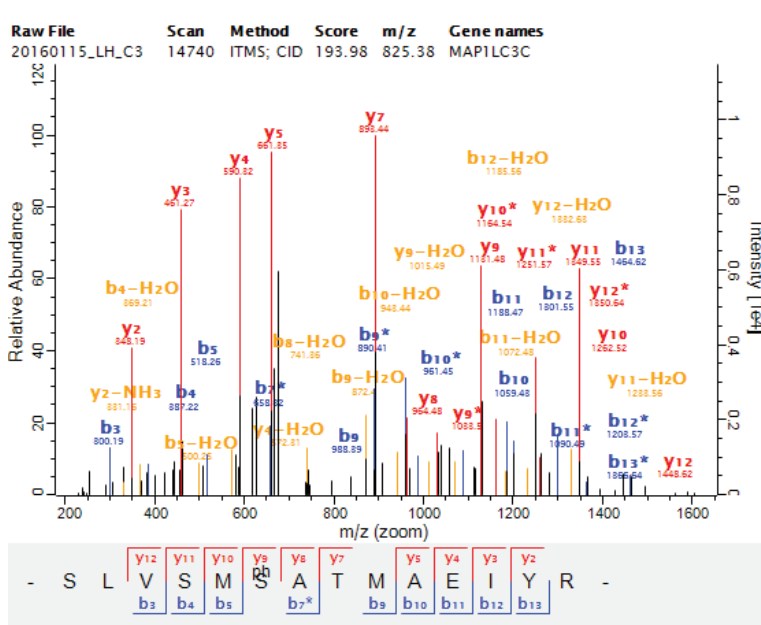

**Fig 2B**

**GABARAP-L2 pS87**

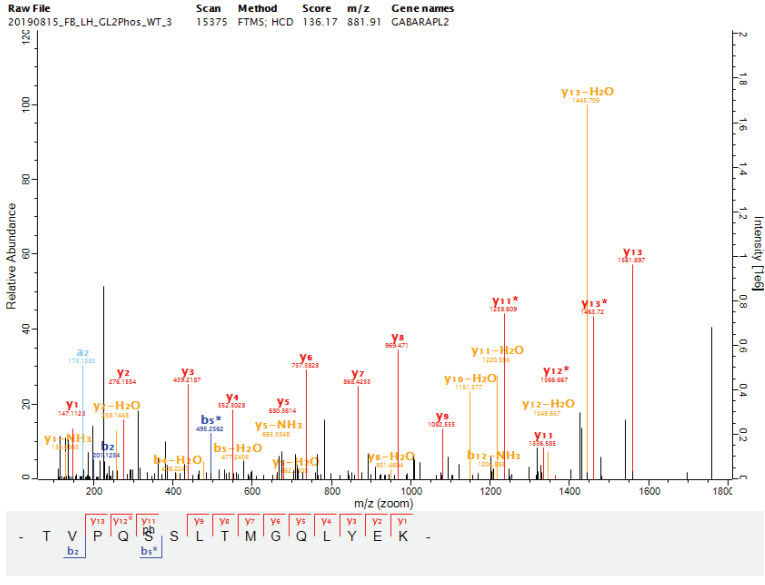

**LC3C pS96**

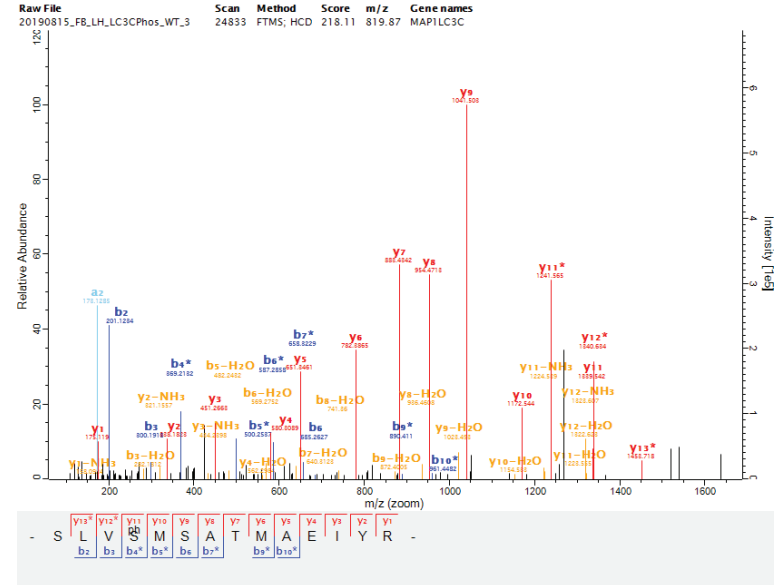

**Fig 2C**

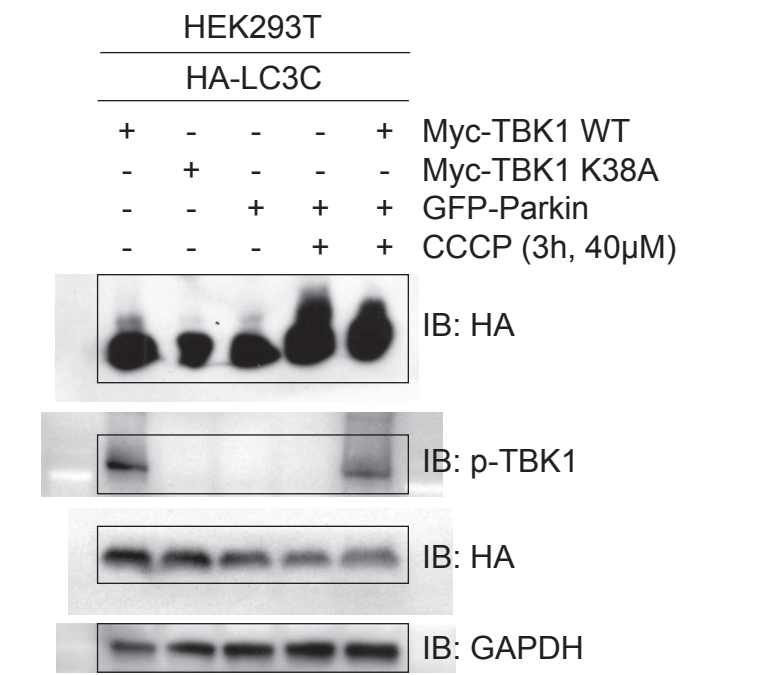

**Fig 2D**

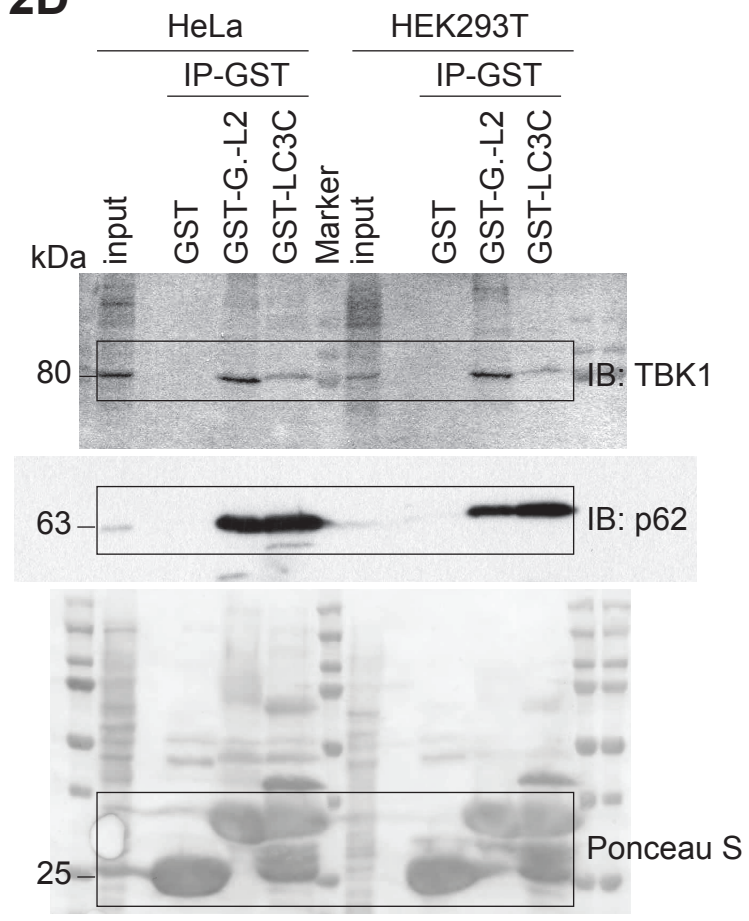

**Fig 2E**

HEK293T

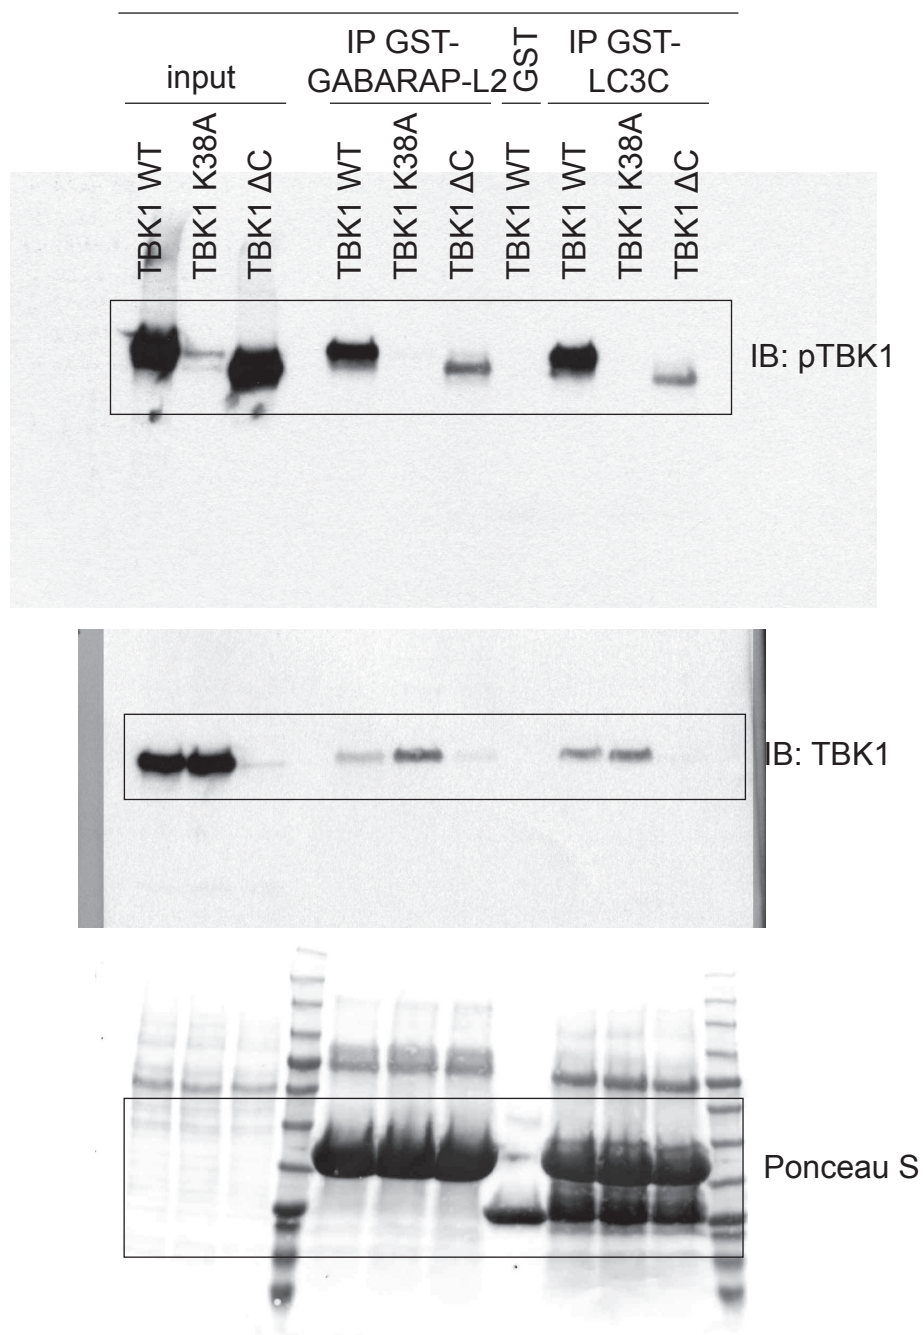

Supplement: EMBR-21-e48317-s008.pdf [file EMBR-21-e48317-s008.pdf]
