# Supplementary material for: TBK1‐mediated phosphorylation of LC3C and GABARAP‐L2 controls autophagosome shedding by ATG4 protease
Source: PubMed Central journal article supplement (PMC6945063; doi:10.15252/embr.201948317), 2019-11-11

**Fig 3A**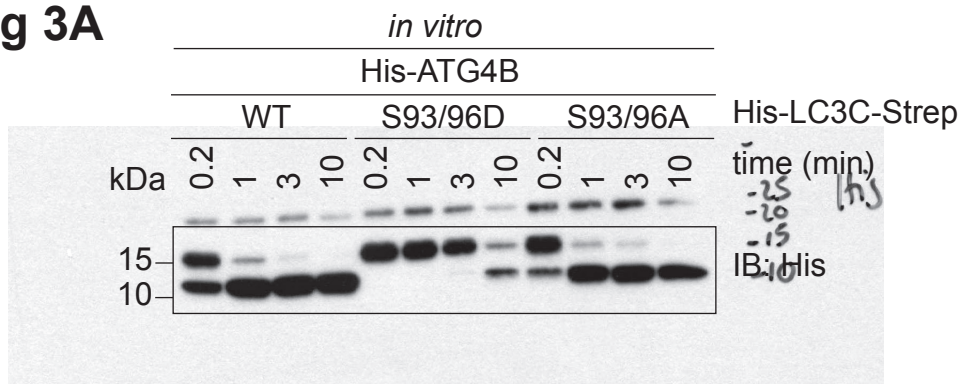**Fig 3B**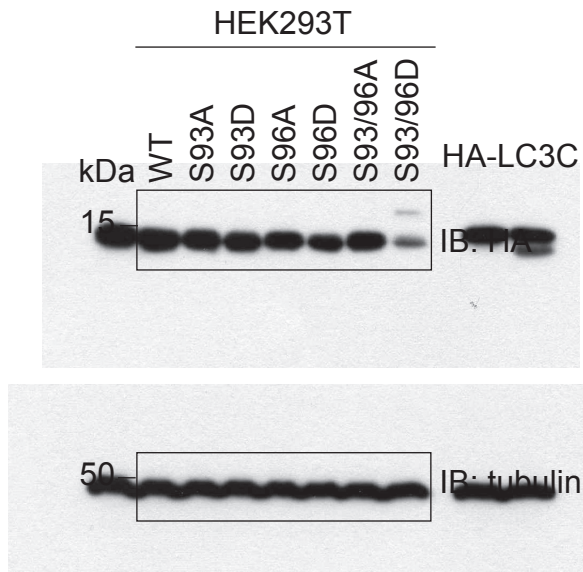**Fig 3C**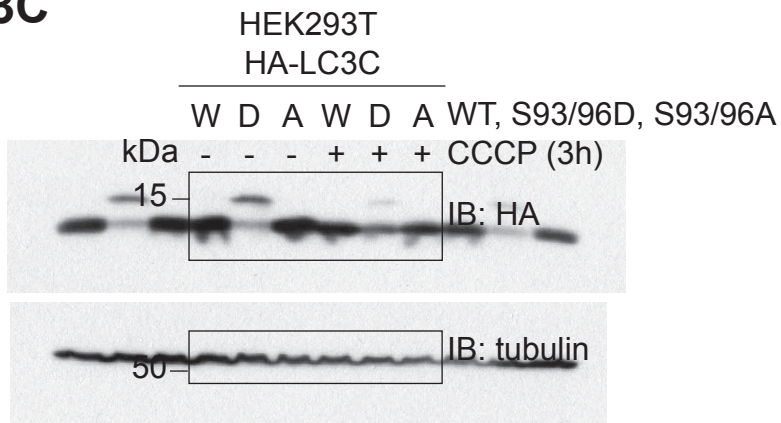**Fig 3D**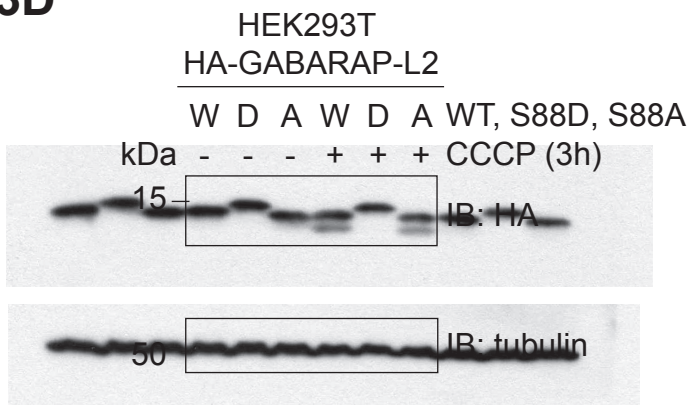

Supplement: EMBR-21-e48317-s009.pdf [file EMBR-21-e48317-s009.pdf]
