# Supplementary material for: TBK1‐mediated phosphorylation of LC3C and GABARAP‐L2 controls autophagosome shedding by ATG4 protease
Source: PubMed Central journal article supplement (PMC6945063; doi:10.15252/embr.201948317), 2019-11-11

Fig 7A

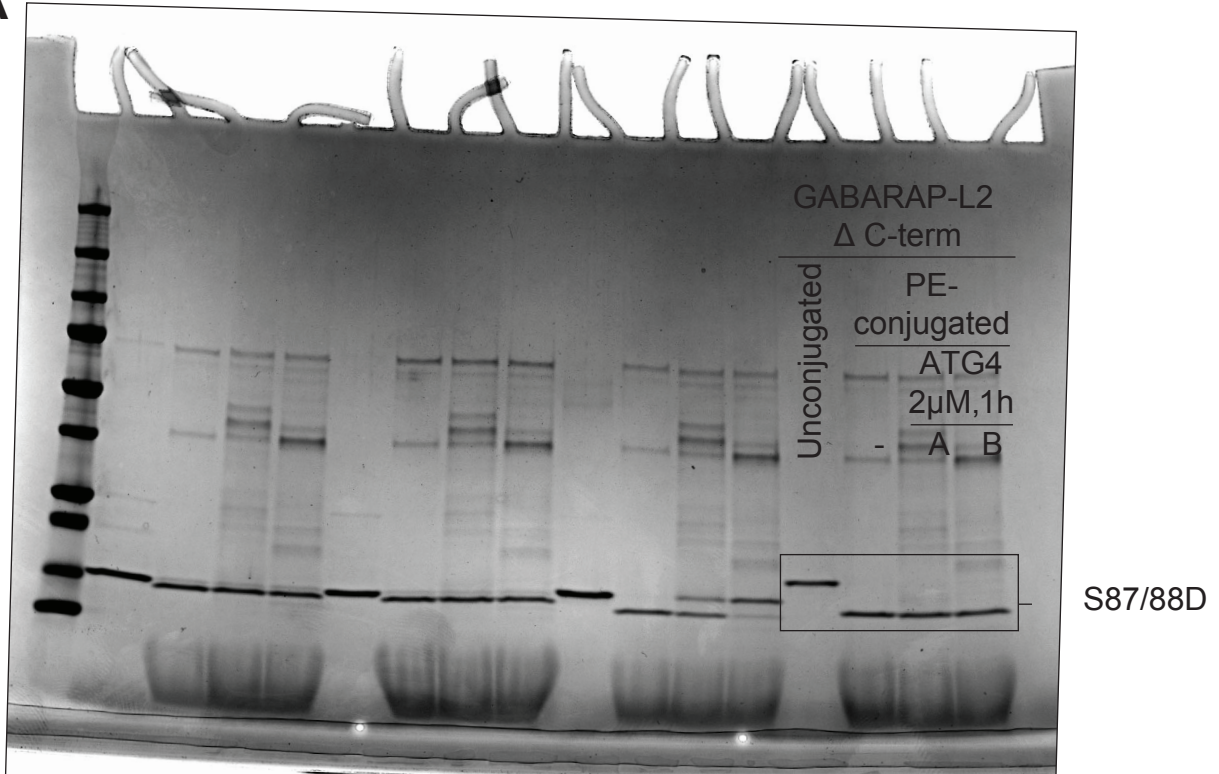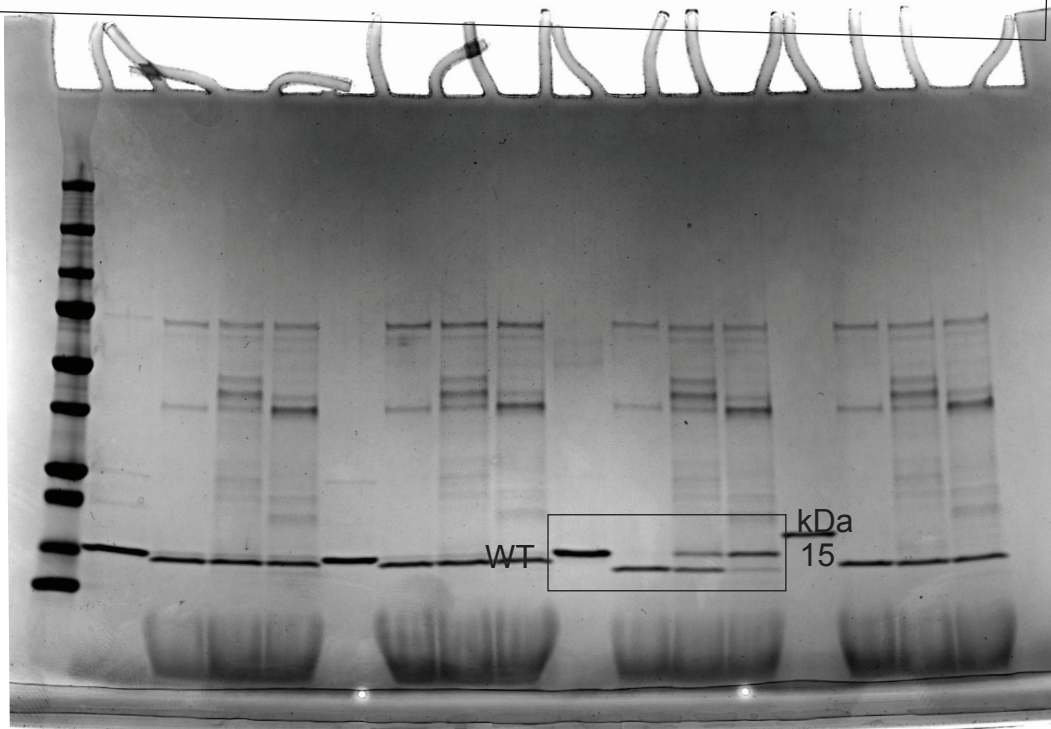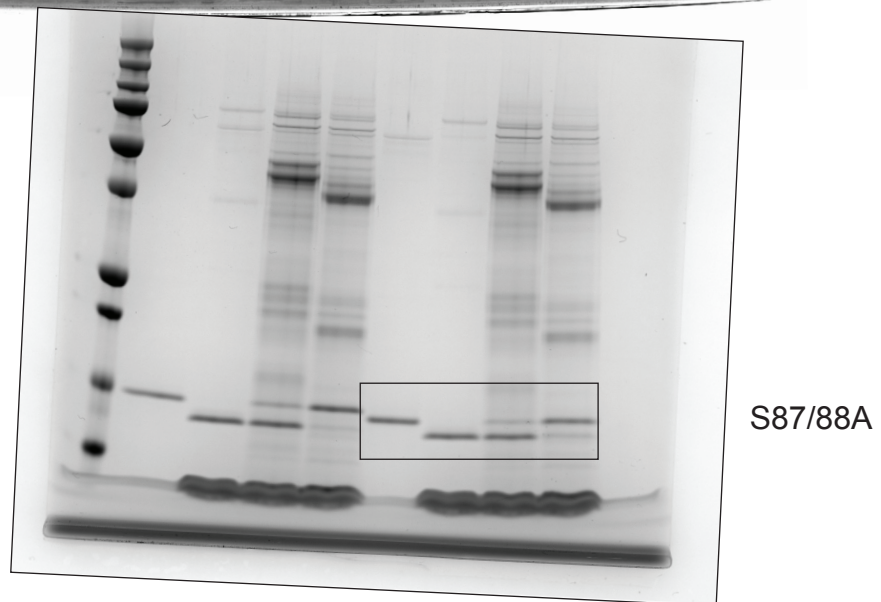

**Fig 7B**

*in vitro* kinase assay  
 $\gamma$ -<sup>32</sup>P ATP, GST-TBK1

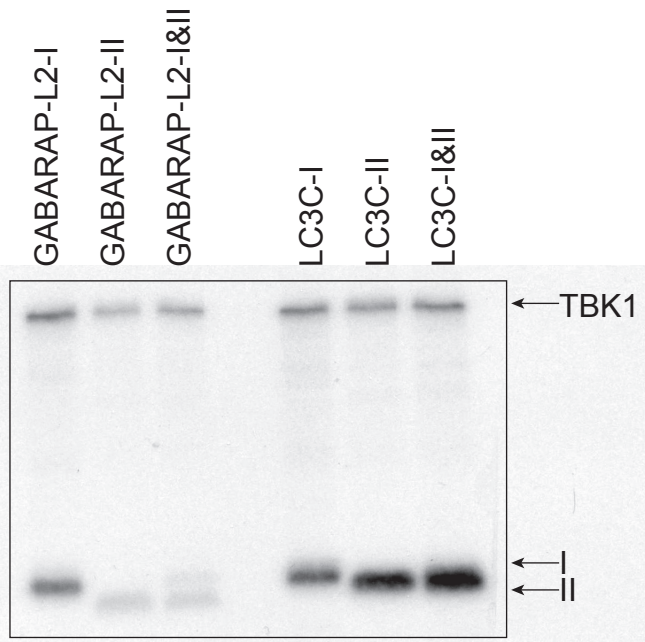

**Fig 7C**

GABARAP-L2 WT  $\Delta$  C-term

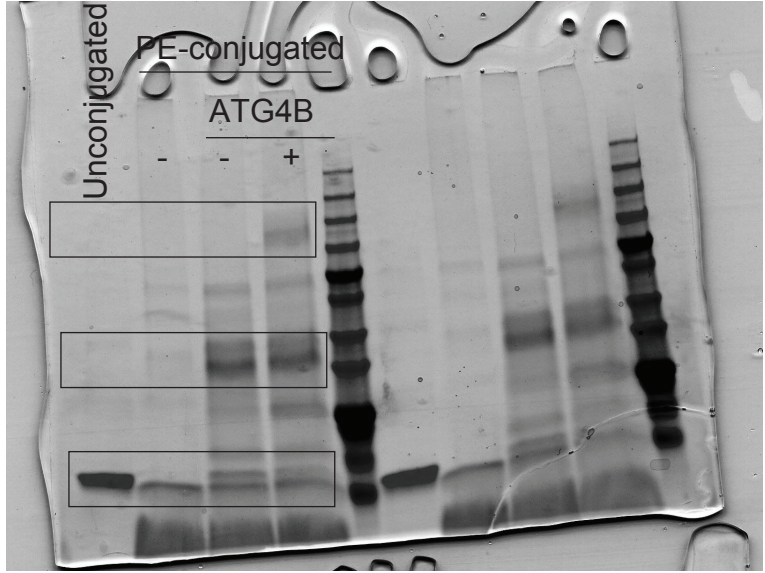

**Fig 7E**

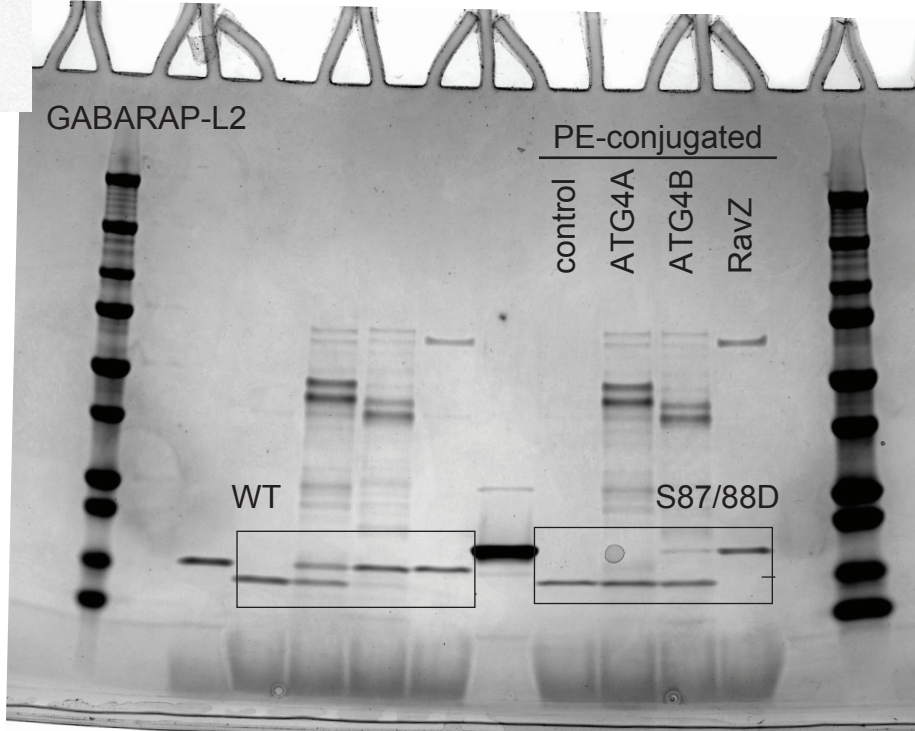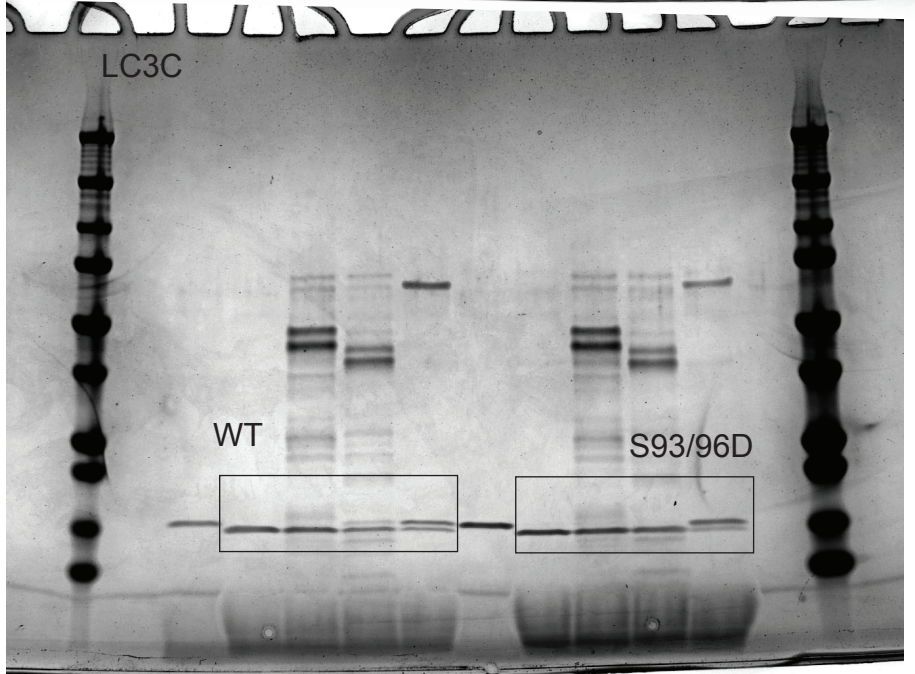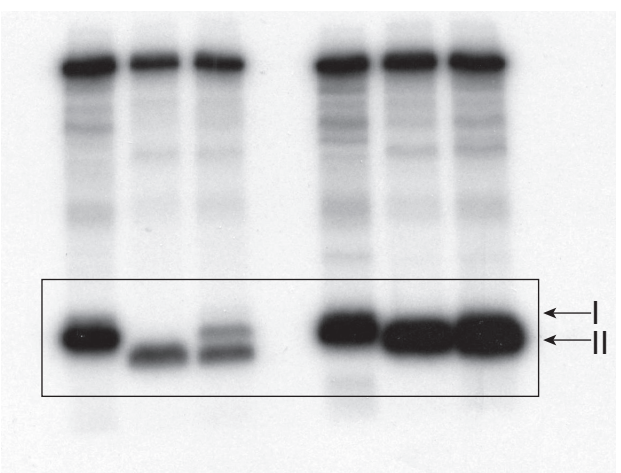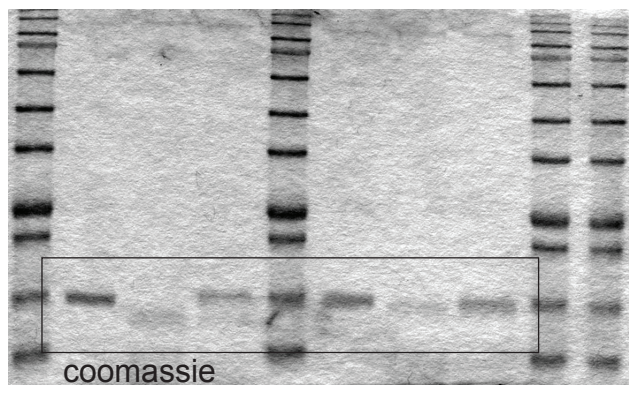

Supplement: EMBR-21-e48317-s012.pdf [file EMBR-21-e48317-s012.pdf]
