# Supplementary material for: TBK1‐mediated phosphorylation of LC3C and GABARAP‐L2 controls autophagosome shedding by ATG4 protease
Source: PubMed Central journal article supplement (PMC6945063; doi:10.15252/embr.201948317), 2019-11-11
Supplement: EMBR-21-e48317-s013.pdf [file EMBR-21-e48317-s013.pdf]

**Fig 8A**

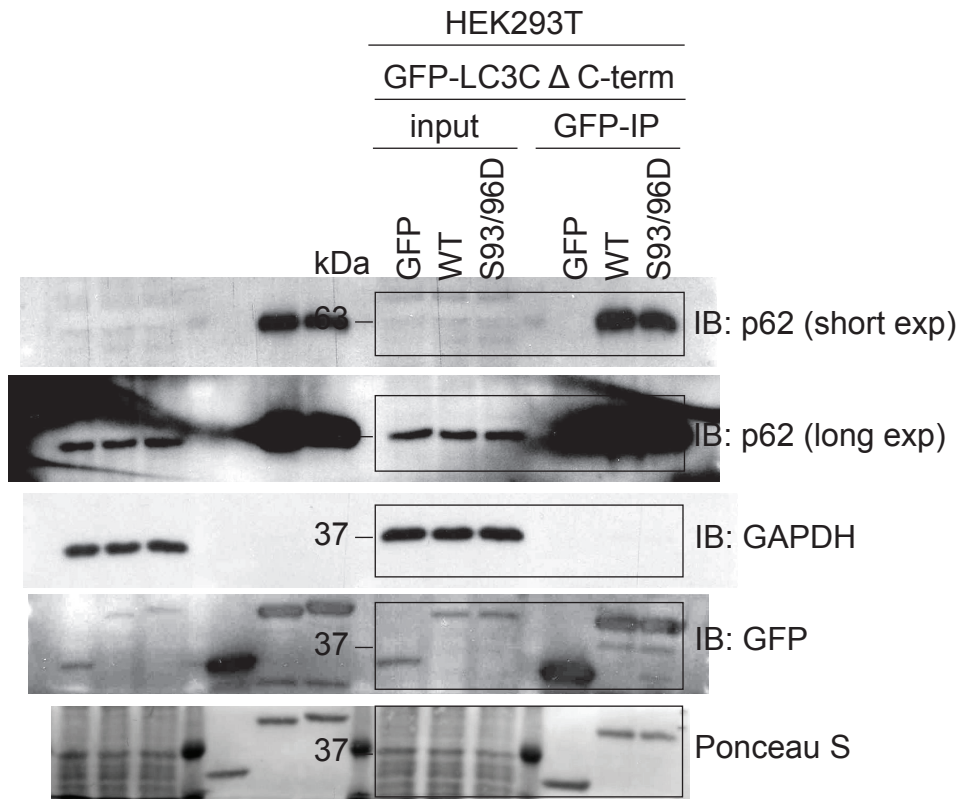

**Fig 8B**

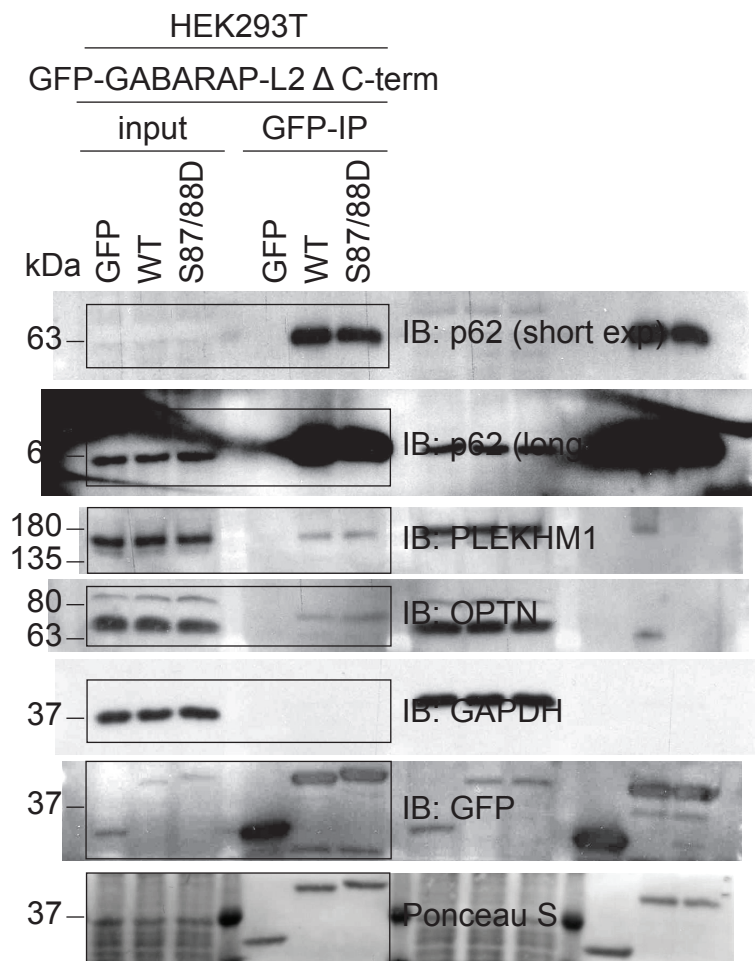

# Batch Analysis Report

Run Date: 8/8/19 1:39 PM

Experiment: 190806\_LinaH

User ID: GSHUser

Statistics Output: N/A

Worksheet PDF Output: C:\BDEExport\Experiment\StefanS\190806\_LinaH-Batch\_Analysis\_08082019133950.pdf

## LC3C WT untreated

| Tube | Status | Run Time       |
|------|--------|----------------|
| 1    | OK     | 8/8/19 1:39 PM |
| 2    | OK     | 8/8/19 1:39 PM |
| 3    | OK     | 8/8/19 1:39 PM |
| 4    | OK     | 8/8/19 1:39 PM |
| 5    | OK     | 8/8/19 1:40 PM |
| 6    | OK     | 8/8/19 1:40 PM |

## LC3C WT CCCP\_16h

| Tube | Status | Run Time       |
|------|--------|----------------|
| 1    | OK     | 8/8/19 1:40 PM |
| 2    | OK     | 8/8/19 1:40 PM |
| 3    | OK     | 8/8/19 1:40 PM |
| 4    | OK     | 8/8/19 1:40 PM |
| 5    | OK     | 8/8/19 1:40 PM |
| 6    | OK     | 8/8/19 1:40 PM |

## LC3C S9396A\_ untreated

| Tube | Status | Run Time       |
|------|--------|----------------|
| 1    | OK     | 8/8/19 1:40 PM |
| 2    | OK     | 8/8/19 1:40 PM |
| 3    | OK     | 8/8/19 1:40 PM |
| 4    | OK     | 8/8/19 1:40 PM |
| 5    | OK     | 8/8/19 1:40 PM |
| 6    | OK     | 8/8/19 1:40 PM |

## LC3C S9396A CCCP\_16h

| Tube | Status | Run Time       |
|------|--------|----------------|
| 1    | OK     | 8/8/19 1:40 PM |
| 2    | OK     | 8/8/19 1:40 PM |

| <b>Tube</b> | <b>Status</b> | <b>Run Time</b> |
|-------------|---------------|-----------------|
| 3           | OK            | 8/8/19 1:40 PM  |
| 4           | OK            | 8/8/19 1:40 PM  |
| 5           | OK            | 8/8/19 1:40 PM  |
| 6           | OK            | 8/8/19 1:40 PM  |

190806\_LinaH

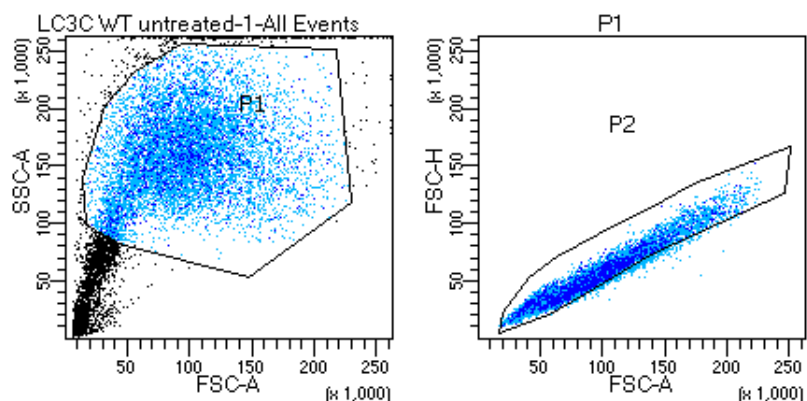

| Experiment Name: | 190806_LinaH            |         |              |                     |                   |
|------------------|-------------------------|---------|--------------|---------------------|-------------------|
| Specimen Name:   | LC3C WT untreated       |         |              |                     |                   |
| Tube Name:       | 1                       |         |              |                     |                   |
| Record Date:     | Aug 6, 2019 10:00:57 AM |         |              |                     |                   |
| Population       | #Events                 | %Parent | %Grand Pa... | mCherry T... Median | GFP FITC-A Median |
| All Events       | 11,729                  | ####    | ####         | 28                  | 121               |
| P1               | 8,858                   | 75.5    | ####         | 26                  | 116               |
| P2               | 8,274                   | 93.4    | 70.5         | 26                  | 115               |
| mCherry pos      | 1,102                   | 13.3    | 12.4         | 6,277               | 21,100            |
| GFP pos          | 1,102                   | 100.0   | 13.3         | 6,277               | 21,100            |

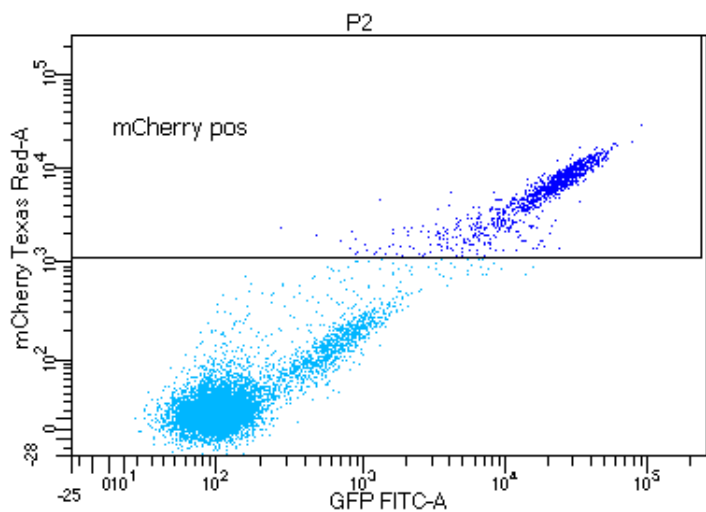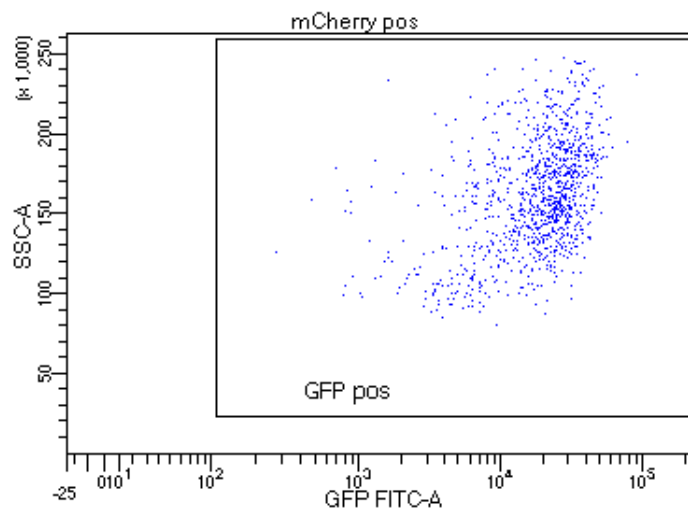

| Tube: 1     |         |         |        |
|-------------|---------|---------|--------|
| Population  | #Events | %Parent | %Total |
| All Events  | 11,729  | ####    | 100.0  |
| P1          | 8,858   | 75.5    | 75.5   |
| P2          | 8,274   | 93.4    | 70.5   |
| mCherry pos | 1,102   | 13.3    | 9.4    |
| GFP pos     | 1,102   | 100.0   | 9.4    |

190806\_LinaH

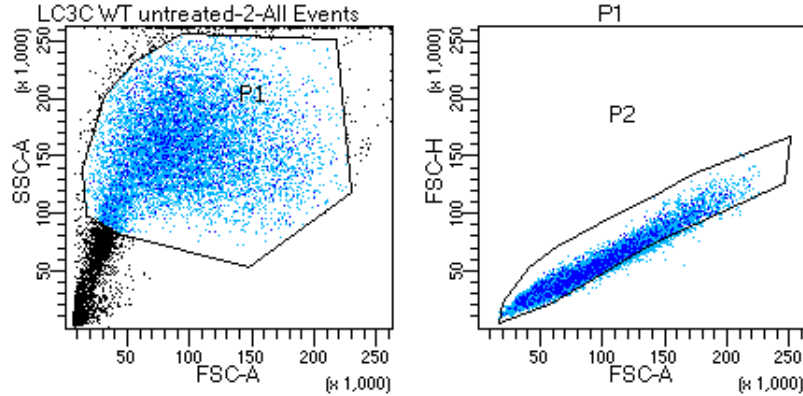

| Experiment Name: | 190806_LinaH            |         |              |                     |                   |
|------------------|-------------------------|---------|--------------|---------------------|-------------------|
| Specimen Name:   | LC3C WT untreated       |         |              |                     |                   |
| Tube Name:       | 2                       |         |              |                     |                   |
| Record Date:     | Aug 6, 2019 10:03:26 AM |         |              |                     |                   |
| Population       | #Events                 | %Parent | %Grand Pa... | mCherry T... Median | GFP FITC-A Median |
| All Events       | 12,010                  | ####    | ####         | 29                  | 119               |
| P1               | 9,166                   | 76.3    | ####         | 27                  | 113               |
| P2               | 8,582                   | 93.6    | 71.5         | 27                  | 112               |
| mCherry pos      | 1,179                   | 13.7    | 12.9         | 6,287               | 21,282            |
| GFP pos          | 1,179                   | 100.0   | 13.7         | 6,287               | 21,282            |

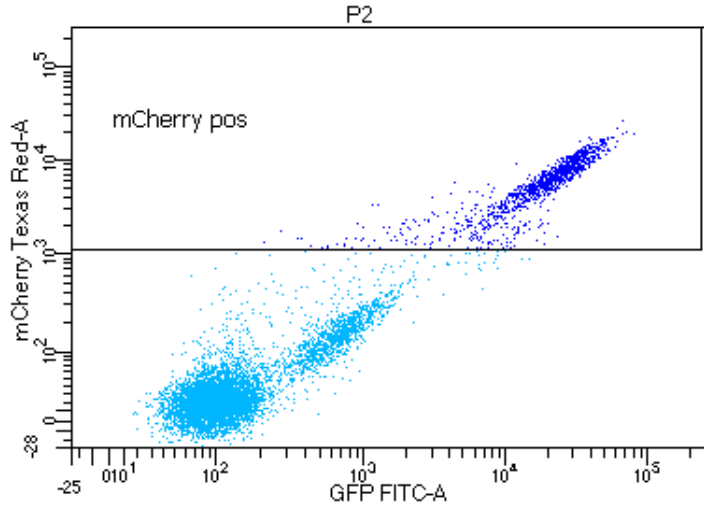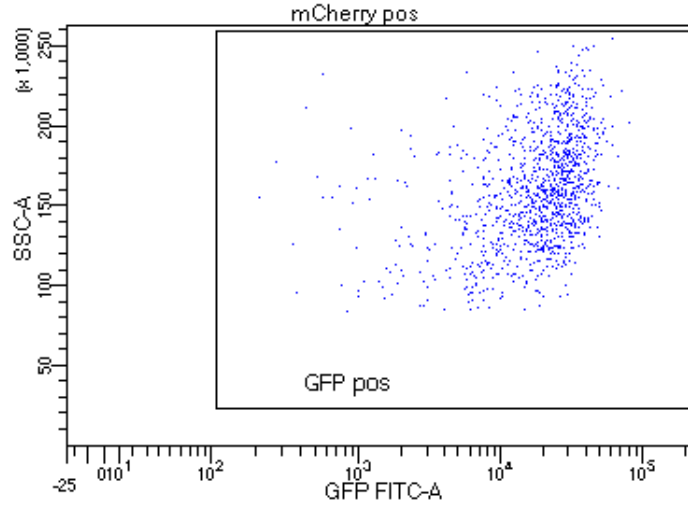

| Tube: 2     |         |         |        |
|-------------|---------|---------|--------|
| Population  | #Events | %Parent | %Total |
| All Events  | 12,010  | ####    | 100.0  |
| P1          | 9,166   | 76.3    | 76.3   |
| P2          | 8,582   | 93.6    | 71.5   |
| mCherry pos | 1,179   | 13.7    | 9.8    |
| GFP pos     | 1,179   | 100.0   | 9.8    |

190806\_LinaH

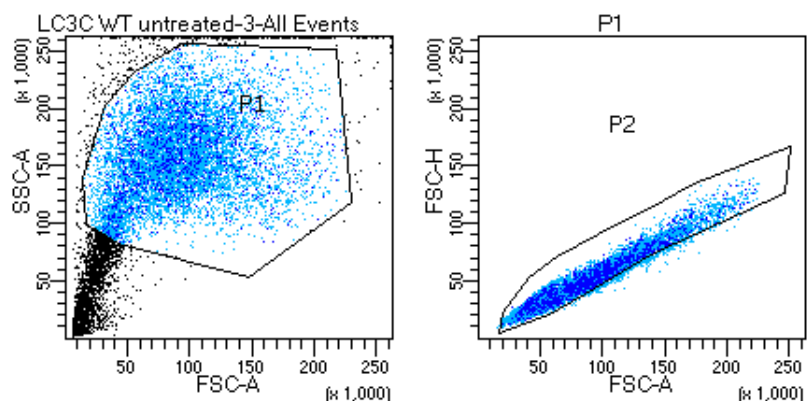

| Experiment Name: | 190806_LinaH            |         |              |                     |                   |
|------------------|-------------------------|---------|--------------|---------------------|-------------------|
| Specimen Name:   | LC3C WT untreated       |         |              |                     |                   |
| Tube Name:       | 3                       |         |              |                     |                   |
| Record Date:     | Aug 6, 2019 10:04:30 AM |         |              |                     |                   |
| Population       | #Events                 | %Parent | %Grand Pa... | mCherry T... Median | GFP FITC-A Median |
| All Events       | 12,253                  | ####    | ####         | 30                  | 127               |
| P1               | 9,269                   | 75.6    | ####         | 27                  | 119               |
| P2               | 8,715                   | 94.0    | 71.1         | 27                  | 117               |
| mCherry pos      | 1,173                   | 13.5    | 12.7         | 6,269               | 20,516            |
| GFP pos          | 1,173                   | 100.0   | 13.5         | 6,269               | 20,516            |

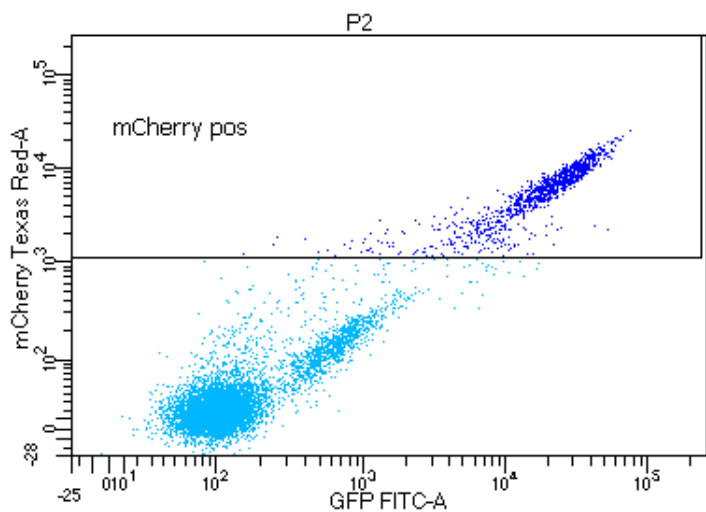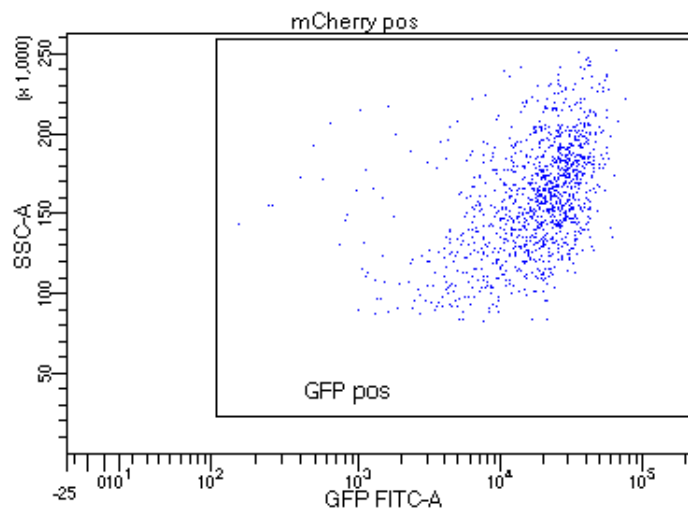

| Tube: 3     |         |         |        |
|-------------|---------|---------|--------|
| Population  | #Events | %Parent | %Total |
| All Events  | 12,253  | ####    | 100.0  |
| P1          | 9,269   | 75.6    | 75.6   |
| P2          | 8,715   | 94.0    | 71.1   |
| mCherry pos | 1,173   | 13.5    | 9.6    |
| GFP pos     | 1,173   | 100.0   | 9.6    |

190806\_LinaH

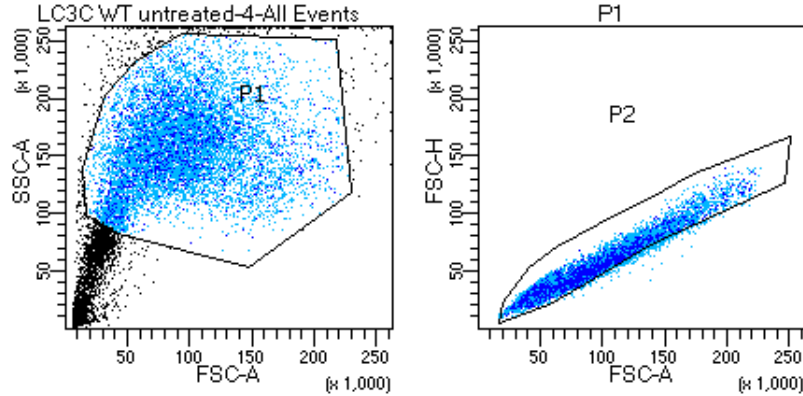

| Experiment Name: | 190806_LinaH            |         |              |                     |                   |
|------------------|-------------------------|---------|--------------|---------------------|-------------------|
| Specimen Name:   | LC3C WT untreated       |         |              |                     |                   |
| Tube Name:       | 4                       |         |              |                     |                   |
| Record Date:     | Aug 6, 2019 10:05:30 AM |         |              |                     |                   |
| Population       | #Events                 | %Parent | %Grand Pa... | mCherry T... Median | GFP FITC-A Median |
| All Events       | 12,019                  | ####    | ####         | 29                  | 119               |
| P1               | 9,217                   | 76.7    | ####         | 27                  | 114               |
| P2               | 8,656                   | 93.9    | 72.0         | 26                  | 112               |
| mCherry pos      | 1,087                   | 12.6    | 11.8         | 5,993               | 19,947            |
| GFP pos          | 1,087                   | 100.0   | 12.6         | 5,993               | 19,947            |

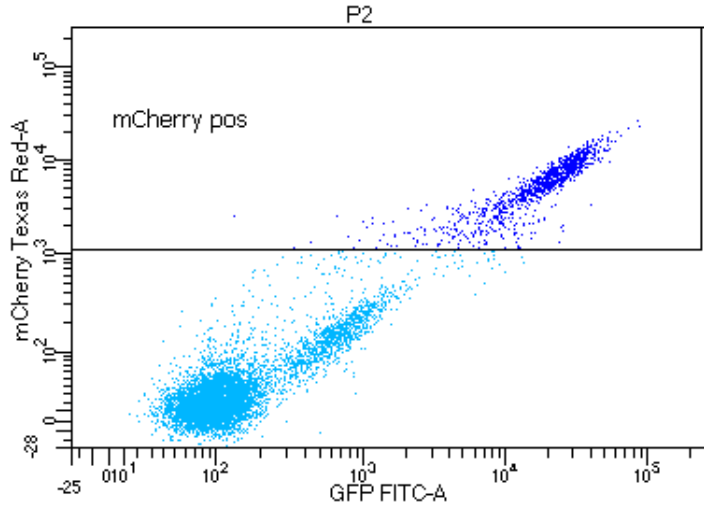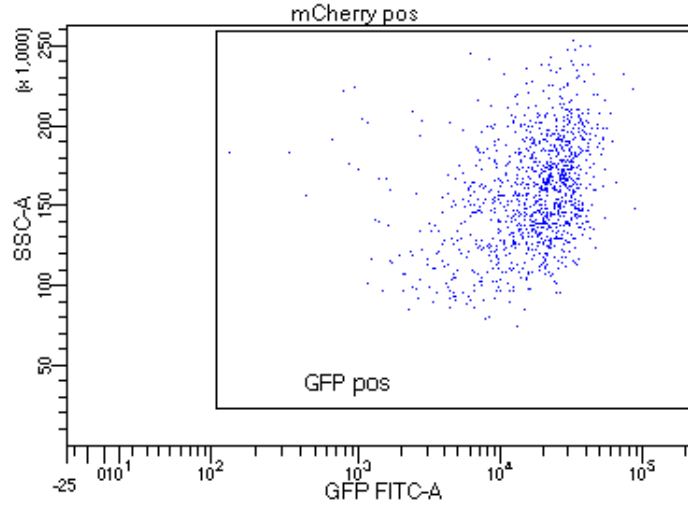

| Tube: 4     |         |         |        |
|-------------|---------|---------|--------|
| Population  | #Events | %Parent | %Total |
| All Events  | 12,019  | ####    | 100.0  |
| P1          | 9,217   | 76.7    | 76.7   |
| P2          | 8,656   | 93.9    | 72.0   |
| mCherry pos | 1,087   | 12.6    | 9.0    |
| GFP pos     | 1,087   | 100.0   | 9.0    |

190806\_LinaH

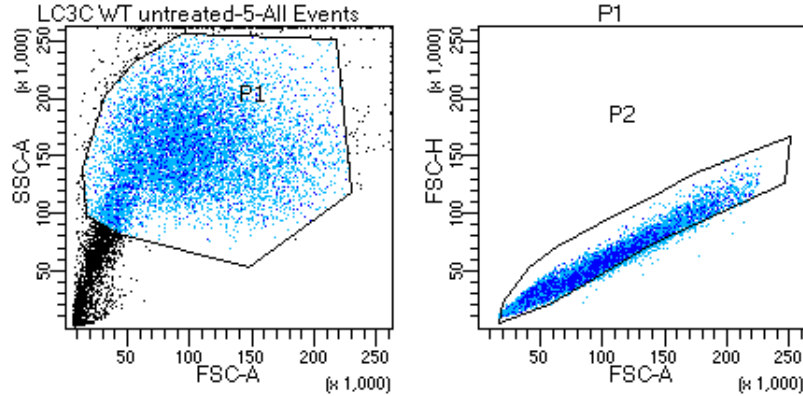

| Experiment Name: | 190806_LinaH            |         |              |                     |                   |
|------------------|-------------------------|---------|--------------|---------------------|-------------------|
| Specimen Name:   | LC3C WT untreated       |         |              |                     |                   |
| Tube Name:       | 5                       |         |              |                     |                   |
| Record Date:     | Aug 6, 2019 10:06:27 AM |         |              |                     |                   |
| Population       | #Events                 | %Parent | %Grand Pa... | mCherry T... Median | GFP FITC-A Median |
| All Events       | 11,244                  | ####    | ####         | 30                  | 115               |
| P1               | 8,699                   | 77.4    | ####         | 27                  | 107               |
| P2               | 8,143                   | 93.6    | 72.4         | 27                  | 105               |
| mCherry pos      | 1,084                   | 13.3    | 12.5         | 6,344               | 21,666            |
| GFP pos          | 1,084                   | 100.0   | 13.3         | 6,344               | 21,666            |

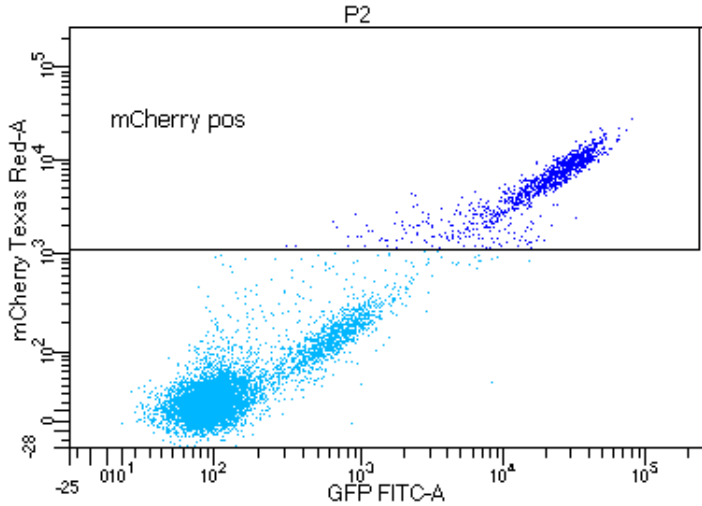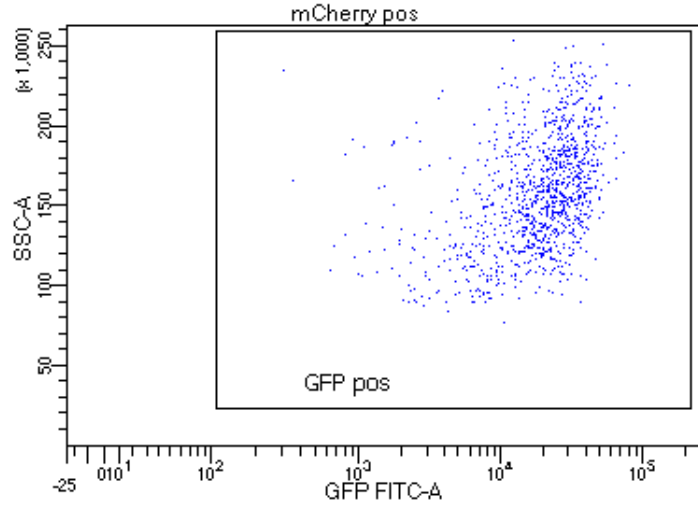

| Tube: 5     |         |         |        |
|-------------|---------|---------|--------|
| Population  | #Events | %Parent | %Total |
| All Events  | 11,244  | ####    | 100.0  |
| P1          | 8,699   | 77.4    | 77.4   |
| P2          | 8,143   | 93.6    | 72.4   |
| mCherry pos | 1,084   | 13.3    | 9.6    |
| GFP pos     | 1,084   | 100.0   | 9.6    |



190806\_LinaH

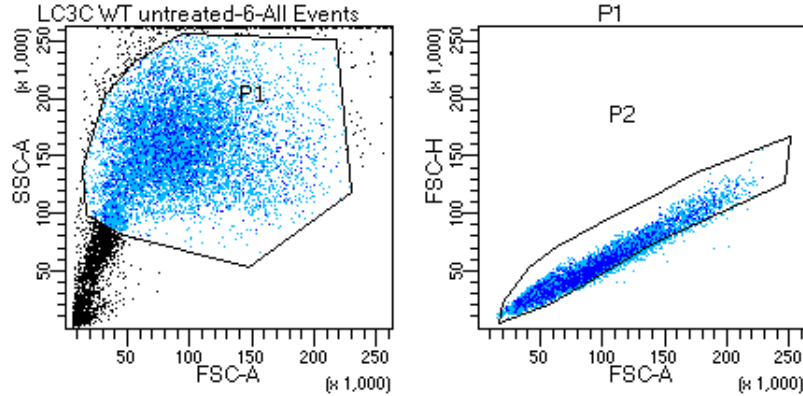

| Experiment Name: | 190806_LinaH            |         |              |                        |                      |
|------------------|-------------------------|---------|--------------|------------------------|----------------------|
| Specimen Name:   | LC3C WT untreated       |         |              |                        |                      |
| Tube Name:       | 6                       |         |              |                        |                      |
| Record Date:     | Aug 6, 2019 10:07:25 AM |         |              |                        |                      |
| Population       | #Events                 | %Parent | %Grand Pa... | mCherry T...<br>Median | GFP FITC-A<br>Median |
| All Events       | 12,193                  | ####    | ####         | 29                     | 119                  |
| P1               | 9,458                   | 77.6    | ####         | 26                     | 113                  |
| P2               | 8,906                   | 94.2    | 73.0         | 26                     | 112                  |
| mCherry pos      | 1,140                   | 12.8    | 12.1         | 6,389                  | 21,184               |
| GFP pos          | 1,140                   | 100.0   | 12.8         | 6,389                  | 21,184               |

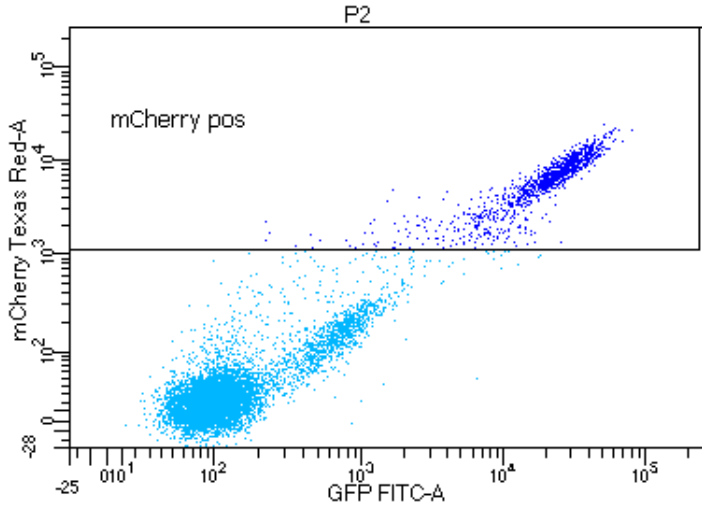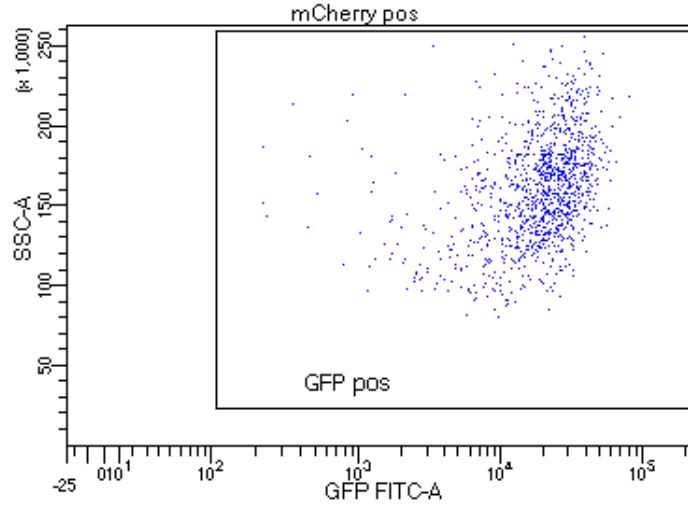

| Tube: 6     |         |         |        |
|-------------|---------|---------|--------|
| Population  | #Events | %Parent | %Total |
| All Events  | 12,193  | ####    | 100.0  |
| P1          | 9,458   | 77.6    | 77.6   |
| P2          | 8,906   | 94.2    | 73.0   |
| mCherry pos | 1,140   | 12.8    | 9.3    |
| GFP pos     | 1,140   | 100.0   | 9.3    |

190806\_LinaH

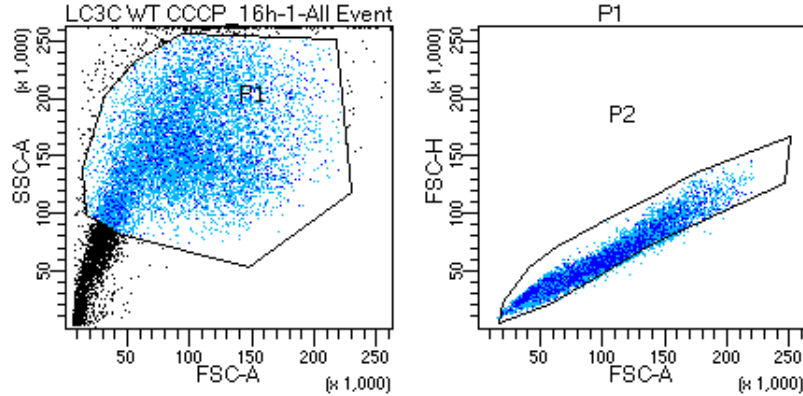

| Experiment Name: | 190806_LinaH            |         |              |                     |                   |
|------------------|-------------------------|---------|--------------|---------------------|-------------------|
| Specimen Name:   | LC3C WT CCCP_16h        |         |              |                     |                   |
| Tube Name:       | 1                       |         |              |                     |                   |
| Record Date:     | Aug 6, 2019 10:09:33 AM |         |              |                     |                   |
| Population       | #Events                 | %Parent | %Grand Pa... | mCherry T... Median | GFP FITC-A Median |
| All Events       | 12,333                  | ####    | ####         | 46                  | 133               |
| P1               | 9,163                   | 74.3    | ####         | 41                  | 116               |
| P2               | 8,867                   | 96.8    | 71.9         | 41                  | 115               |
| mCherry pos      | 1,174                   | 13.2    | 12.8         | 2,844               | 6,259             |
| GFP pos          | 1,173                   | 99.9    | 13.2         | 2,846               | 6,260             |

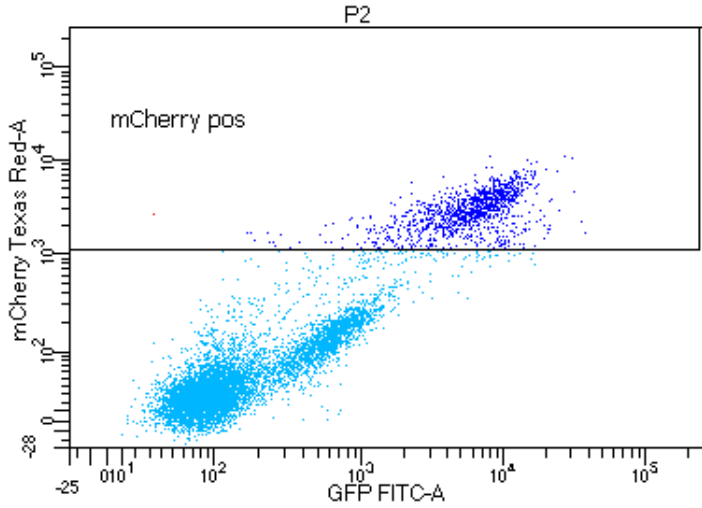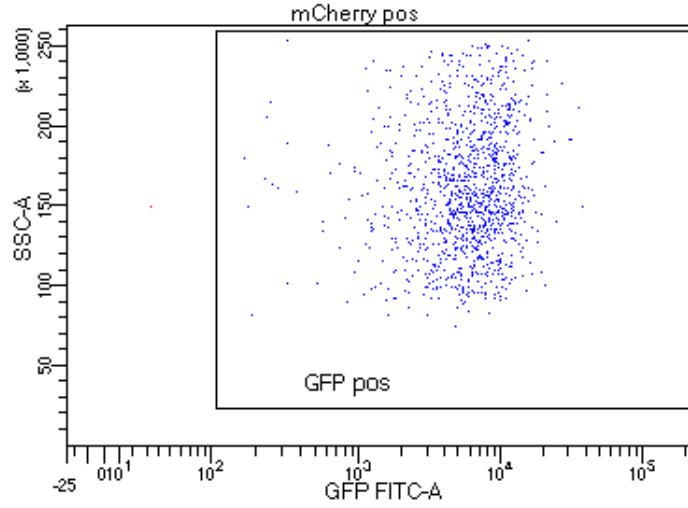

| Tube: 1     |         |         |        |
|-------------|---------|---------|--------|
| Population  | #Events | %Parent | %Total |
| All Events  | 12,333  | ####    | 100.0  |
| P1          | 9,163   | 74.3    | 74.3   |
| P2          | 8,867   | 96.8    | 71.9   |
| mCherry pos | 1,174   | 13.2    | 9.5    |
| GFP pos     | 1,173   | 99.9    | 9.5    |

190806\_LinaH

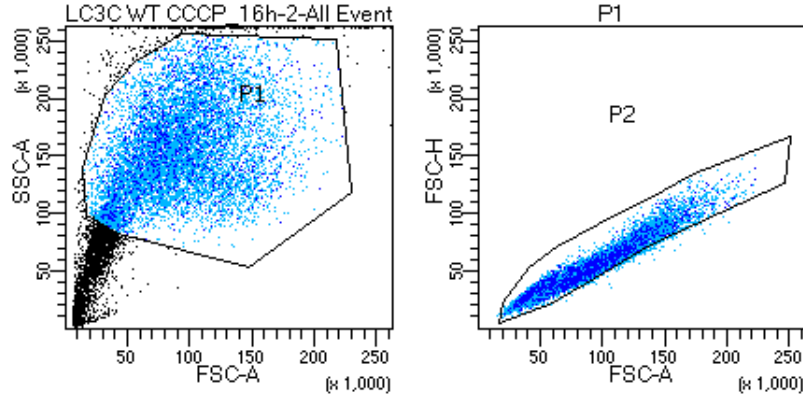

| Experiment Name: | 190806_LinaH            |         |              |                     |                   |
|------------------|-------------------------|---------|--------------|---------------------|-------------------|
| Specimen Name:   | LC3C WT CCCP_16h        |         |              |                     |                   |
| Tube Name:       | 2                       |         |              |                     |                   |
| Record Date:     | Aug 6, 2019 10:10:58 AM |         |              |                     |                   |
| Population       | #Events                 | %Parent | %Grand Pa... | mCherry T... Median | GFP FITC-A Median |
| All Events       | 12,050                  | ####    | ####         | 42                  | 127               |
| P1               | 9,066                   | 75.2    | ####         | 39                  | 115               |
| P2               | 8,758                   | 96.6    | 72.7         | 39                  | 114               |
| mCherry pos      | 1,171                   | 13.4    | 12.9         | 2,939               | 5,004             |
| GFP pos          | 1,171                   | 100.0   | 13.4         | 2,939               | 5,004             |

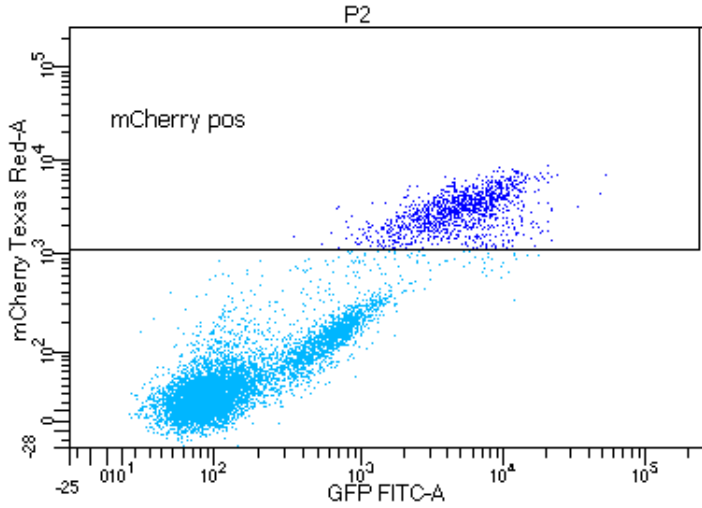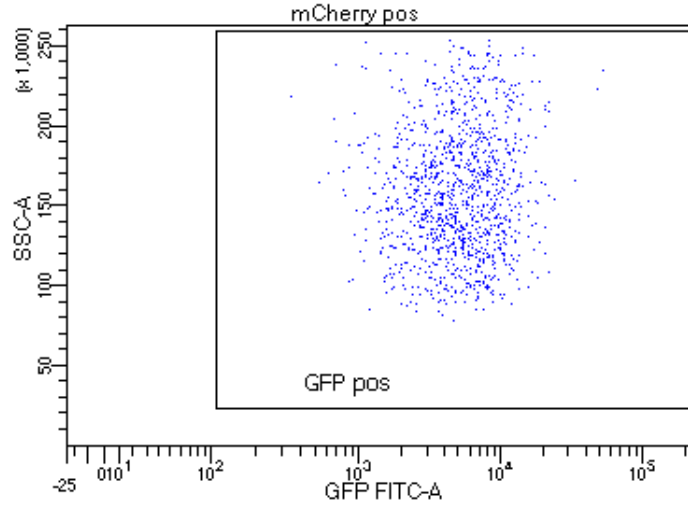

| Tube: 2     |         |         |        |
|-------------|---------|---------|--------|
| Population  | #Events | %Parent | %Total |
| All Events  | 12,050  | ####    | 100.0  |
| P1          | 9,066   | 75.2    | 75.2   |
| P2          | 8,758   | 96.6    | 72.7   |
| mCherry pos | 1,171   | 13.4    | 9.7    |
| GFP pos     | 1,171   | 100.0   | 9.7    |

190806\_LinaH

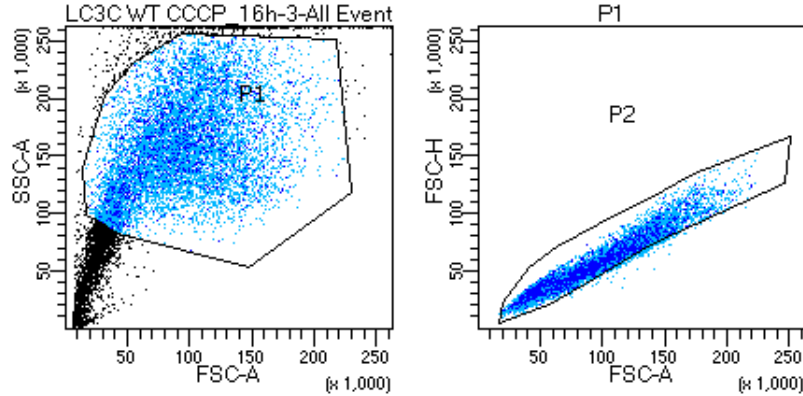

| Experiment Name: | 190806_LinaH            |         |              |                     |                   |
|------------------|-------------------------|---------|--------------|---------------------|-------------------|
| Specimen Name:   | LC3C WT CCCP_16h        |         |              |                     |                   |
| Tube Name:       | 3                       |         |              |                     |                   |
| Record Date:     | Aug 6, 2019 10:12:20 AM |         |              |                     |                   |
| Population       | #Events                 | %Parent | %Grand Pa... | mCherry T... Median | GFP FITC-A Median |
| All Events       | 12,617                  | ####    | ####         | 45                  | 130               |
| P1               | 9,459                   | 75.0    | ####         | 40                  | 112               |
| P2               | 9,169                   | 96.9    | 72.7         | 39                  | 111               |
| mCherry pos      | 1,175                   | 12.8    | 12.4         | 2,993               | 6,330             |
| GFP pos          | 1,175                   | 100.0   | 12.8         | 2,993               | 6,330             |

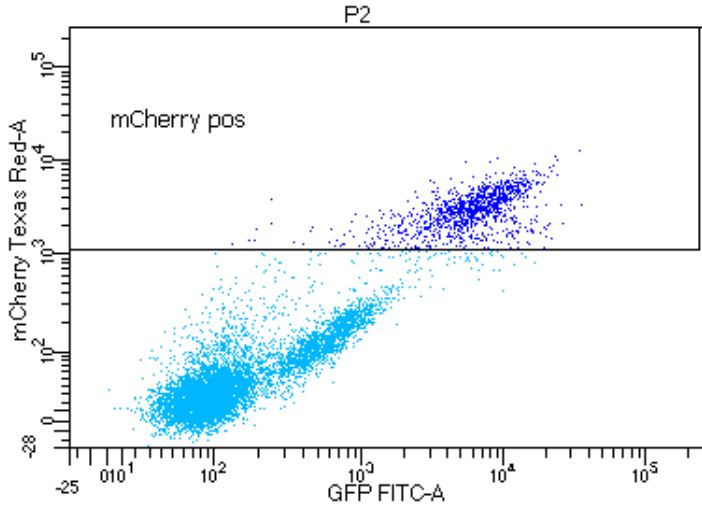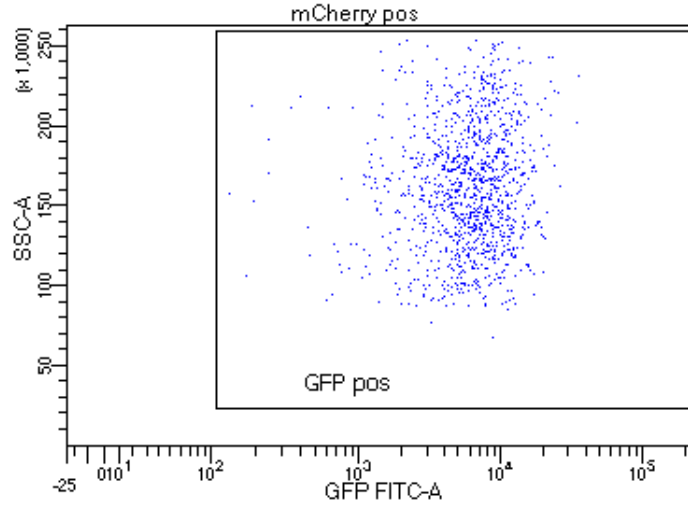

| Tube: 3     |         |         |        |
|-------------|---------|---------|--------|
| Population  | #Events | %Parent | %Total |
| All Events  | 12,617  | ####    | 100.0  |
| P1          | 9,459   | 75.0    | 75.0   |
| P2          | 9,169   | 96.9    | 72.7   |
| mCherry pos | 1,175   | 12.8    | 9.3    |
| GFP pos     | 1,175   | 100.0   | 9.3    |

190806\_LinaH

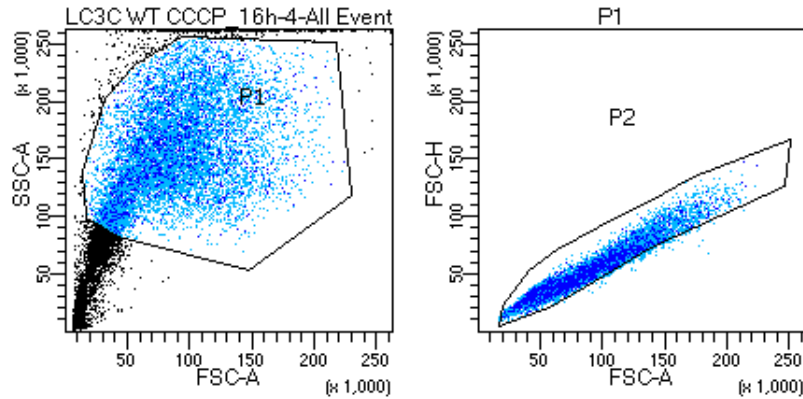

| Experiment Name: | 190806_LinaH            |         |              |                        |                      |
|------------------|-------------------------|---------|--------------|------------------------|----------------------|
| Specimen Name:   | LC3C WT CCCP_16h        |         |              |                        |                      |
| Tube Name:       | 4                       |         |              |                        |                      |
| Record Date:     | Aug 6, 2019 10:13:43 AM |         |              |                        |                      |
| Population       | #Events                 | %Parent | %Grand Pa... | mCherry T...<br>Median | GFP FITC-A<br>Median |
| All Events       | 13,391                  | ####    | ####         | 44                     | 129                  |
| P1               | 9,936                   | 74.2    | ####         | 38                     | 113                  |
| P2               | 9,644                   | 97.1    | 72.0         | 38                     | 111                  |
| mCherry pos      | 1,292                   | 13.4    | 13.0         | 2,940                  | 5,375                |
| GFP pos          | 1,292                   | 100.0   | 13.4         | 2,940                  | 5,375                |

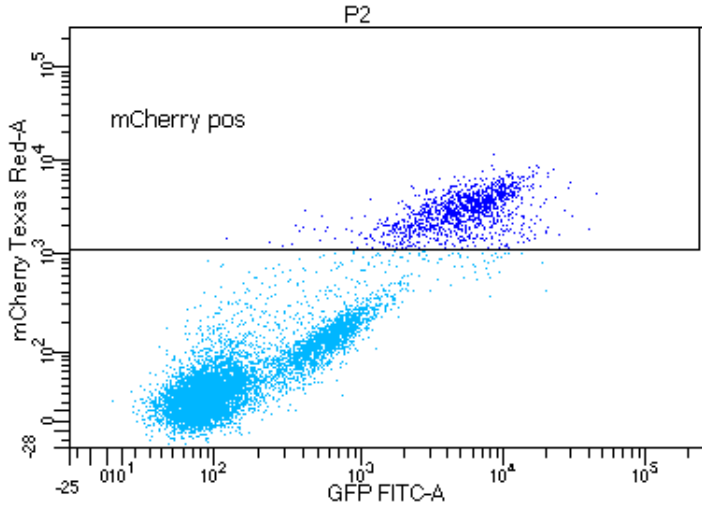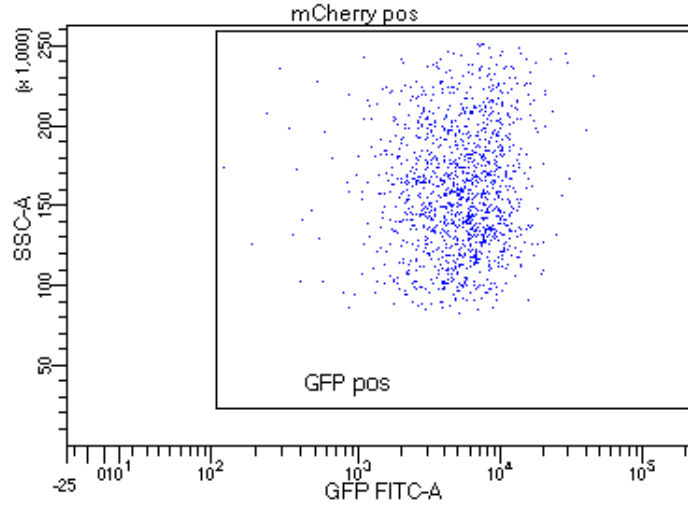

| Tube: 4     |         |         |        |
|-------------|---------|---------|--------|
| Population  | #Events | %Parent | %Total |
| All Events  | 13,391  | ####    | 100.0  |
| P1          | 9,936   | 74.2    | 74.2   |
| P2          | 9,644   | 97.1    | 72.0   |
| mCherry pos | 1,292   | 13.4    | 9.6    |
| GFP pos     | 1,292   | 100.0   | 9.6    |

190806\_LinaH

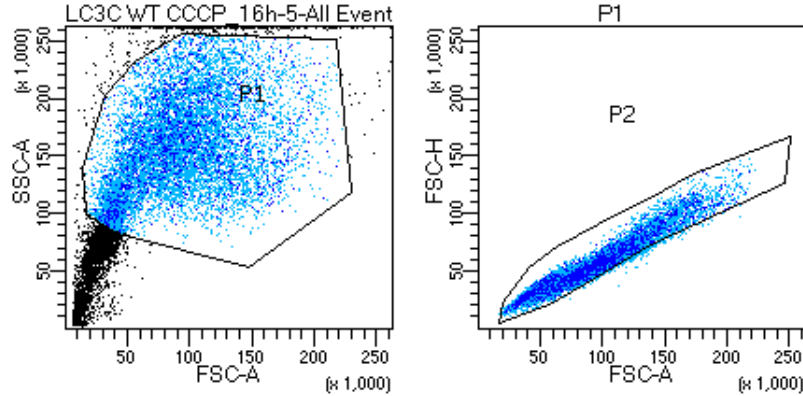

| Experiment Name: | 190806_LinaH            |         |              |                     |                   |
|------------------|-------------------------|---------|--------------|---------------------|-------------------|
| Specimen Name:   | LC3C WT CCCP_16h        |         |              |                     |                   |
| Tube Name:       | 5                       |         |              |                     |                   |
| Record Date:     | Aug 6, 2019 10:14:51 AM |         |              |                     |                   |
| Population       | #Events                 | %Parent | %Grand Pa... | mCherry T... Median | GFP FITC-A Median |
| All Events       | 13,566                  | ####    | ####         | 47                  | 135               |
| P1               | 9,792                   | 72.2    | ####         | 42                  | 117               |
| P2               | 9,481                   | 96.8    | 69.9         | 42                  | 115               |
| mCherry pos      | 1,296                   | 13.7    | 13.2         | 2,839               | 6,039             |
| GFP pos          | 1,296                   | 100.0   | 13.7         | 2,839               | 6,039             |

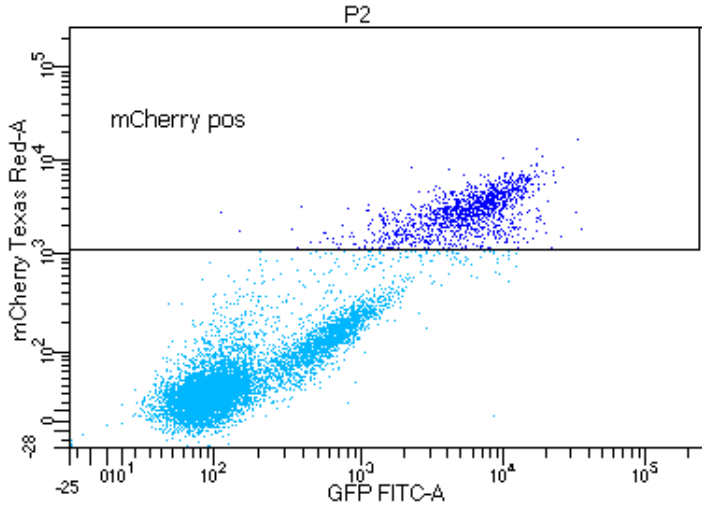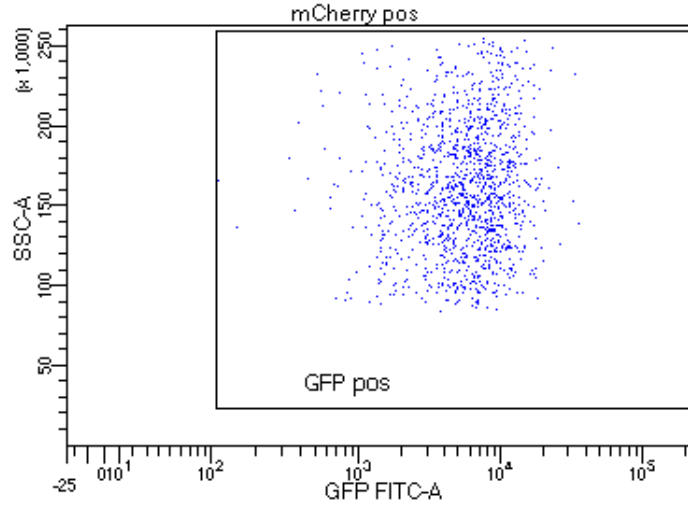

| Tube: 5     |         |         |        |
|-------------|---------|---------|--------|
| Population  | #Events | %Parent | %Total |
| All Events  | 13,566  | ####    | 100.0  |
| P1          | 9,792   | 72.2    | 72.2   |
| P2          | 9,481   | 96.8    | 69.9   |
| mCherry pos | 1,296   | 13.7    | 9.6    |
| GFP pos     | 1,296   | 100.0   | 9.6    |

190806\_LinaH

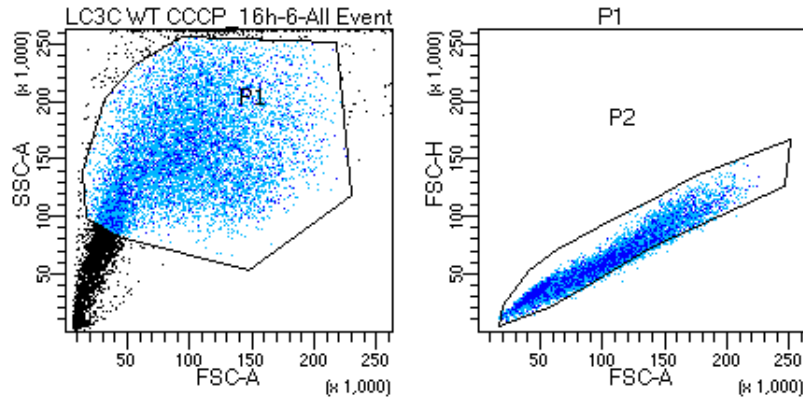

| Experiment Name: | 190806_LinaH            |         |              |                     |                   |
|------------------|-------------------------|---------|--------------|---------------------|-------------------|
| Specimen Name:   | LC3C WT CCCP_16h        |         |              |                     |                   |
| Tube Name:       | 6                       |         |              |                     |                   |
| Record Date:     | Aug 6, 2019 10:16:00 AM |         |              |                     |                   |
| Population       | #Events                 | %Parent | %Grand Pa... | mCherry T... Median | GFP FITC-A Median |
| All Events       | 12,731                  | ####    | ####         | 49                  | 146               |
| P1               | 9,188                   | 72.2    | ####         | 44                  | 121               |
| P2               | 8,871                   | 96.5    | 69.7         | 43                  | 119               |
| mCherry pos      | 1,198                   | 13.5    | 13.0         | 2,883               | 6,017             |
| GFP pos          | 1,198                   | 100.0   | 13.5         | 2,883               | 6,017             |

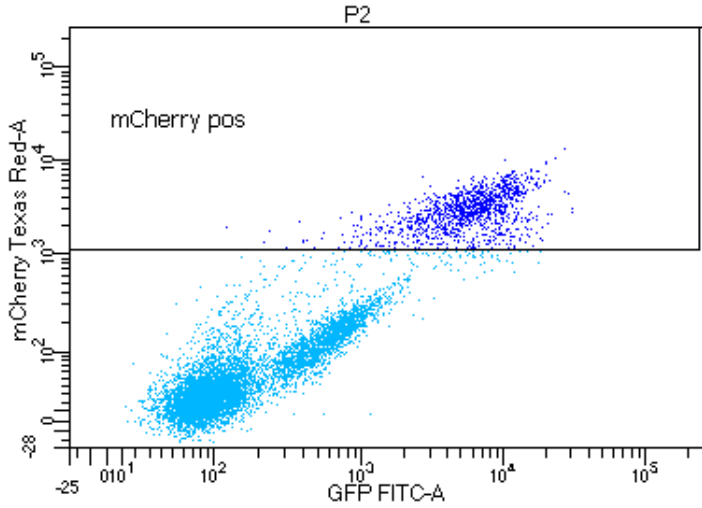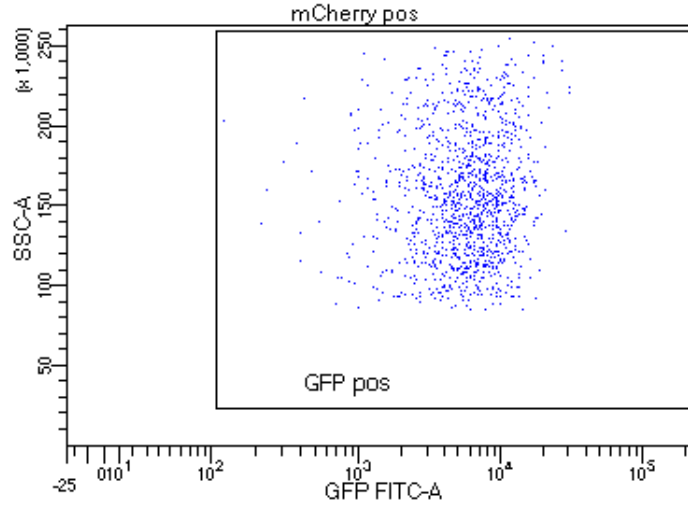

| Tube: 6     |         |         |        |
|-------------|---------|---------|--------|
| Population  | #Events | %Parent | %Total |
| All Events  | 12,731  | ####    | 100.0  |
| P1          | 9,188   | 72.2    | 72.2   |
| P2          | 8,871   | 96.5    | 69.7   |
| mCherry pos | 1,198   | 13.5    | 9.4    |
| GFP pos     | 1,198   | 100.0   | 9.4    |

190806\_LinaH

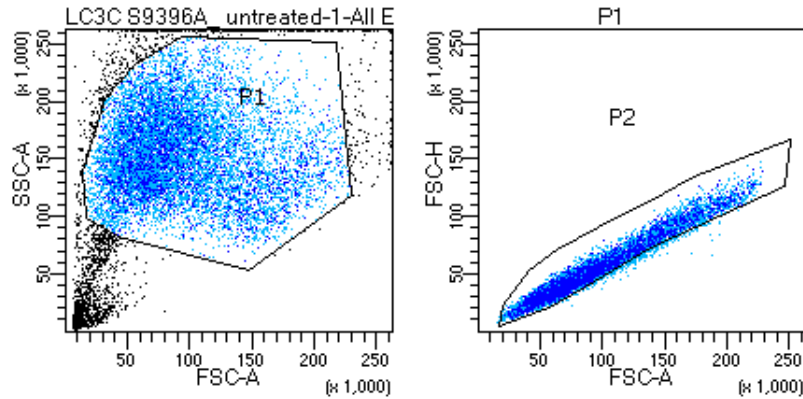

| Experiment Name: | 190806_LinaH            |         |              |                        |                      |
|------------------|-------------------------|---------|--------------|------------------------|----------------------|
| Specimen Name:   | LC3C S9396A_untreated   |         |              |                        |                      |
| Tube Name:       | 1                       |         |              |                        |                      |
| Record Date:     | Aug 6, 2019 10:17:46 AM |         |              |                        |                      |
| Population       | #Events                 | %Parent | %Grand Pa... | mCherry T...<br>Median | GFP FITC-A<br>Median |
| All Events       | 12,276                  | ####    | ####         | 22                     | 97                   |
| P1               | 10,339                  | 84.2    | ####         | 22                     | 95                   |
| P2               | 9,824                   | 95.0    | 80.0         | 21                     | 94                   |
| mCherry pos      | 1,913                   | 19.5    | 18.5         | 5,255                  | 18,115               |
| GFP pos          | 1,913                   | 100.0   | 19.5         | 5,255                  | 18,115               |

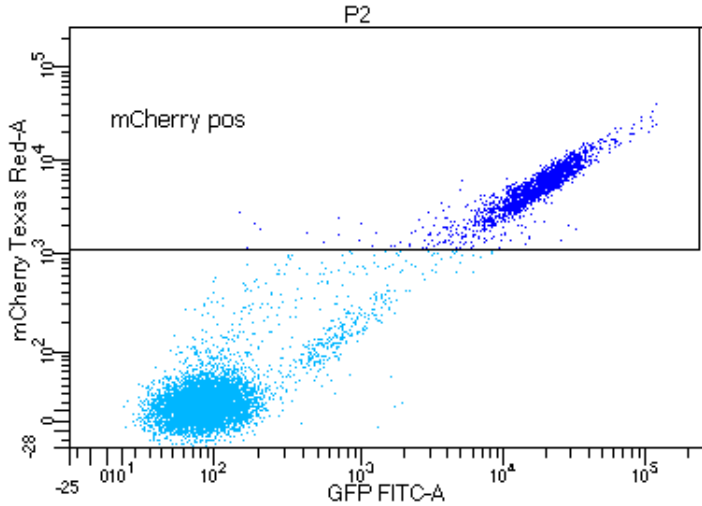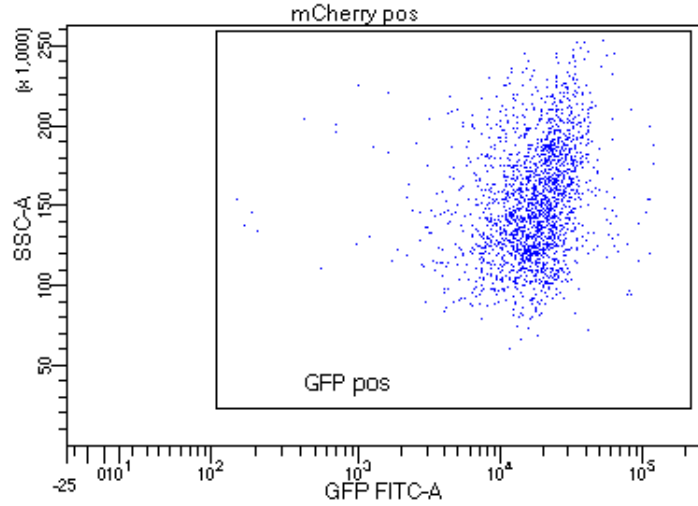

| Tube: 1     |         |         |        |
|-------------|---------|---------|--------|
| Population  | #Events | %Parent | %Total |
| All Events  | 12,276  | ####    | 100.0  |
| P1          | 10,339  | 84.2    | 84.2   |
| P2          | 9,824   | 95.0    | 80.0   |
| mCherry pos | 1,913   | 19.5    | 15.6   |
| GFP pos     | 1,913   | 100.0   | 15.6   |



190806\_LinaH

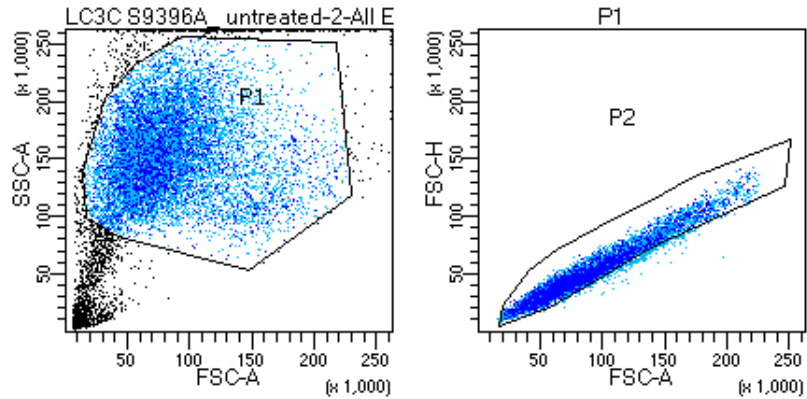

| Experiment Name: | 190806_LinaH            |         |              |                     |                   |
|------------------|-------------------------|---------|--------------|---------------------|-------------------|
| Specimen Name:   | LC3C S9396A_untreated   |         |              |                     |                   |
| Tube Name:       | 2                       |         |              |                     |                   |
| Record Date:     | Aug 6, 2019 10:18:38 AM |         |              |                     |                   |
| Population       | #Events                 | %Parent | %Grand Pa... | mCherry T... Median | GFP FITC-A Median |
| All Events       | 13,052                  | ####    | ####         | 23                  | 108               |
| P1               | 10,977                  | 84.1    | ####         | 23                  | 108               |
| P2               | 10,482                  | 95.5    | 80.3         | 22                  | 106               |
| mCherry pos      | 2,075                   | 19.8    | 18.9         | 5,517               | 18,268            |
| GFP pos          | 2,072                   | 99.9    | 19.8         | 5,525               | 18,303            |

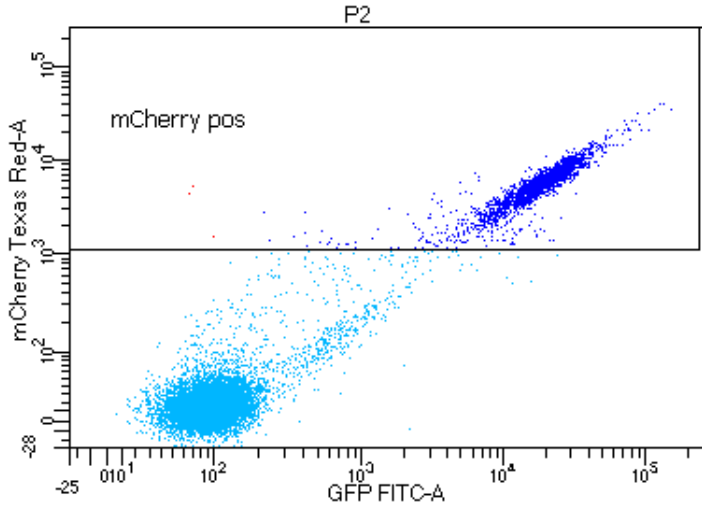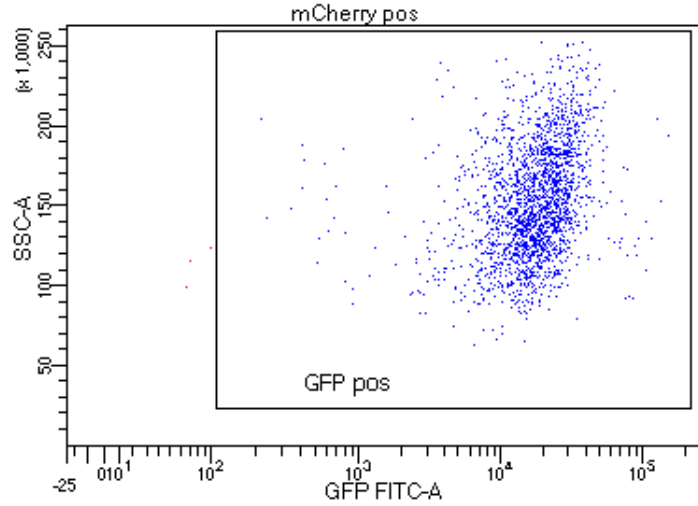

| Tube: 2     |         |         |        |
|-------------|---------|---------|--------|
| Population  | #Events | %Parent | %Total |
| All Events  | 13,052  | ####    | 100.0  |
| P1          | 10,977  | 84.1    | 84.1   |
| P2          | 10,482  | 95.5    | 80.3   |
| mCherry pos | 2,075   | 19.8    | 15.9   |
| GFP pos     | 2,072   | 99.9    | 15.9   |

190806\_LinaH

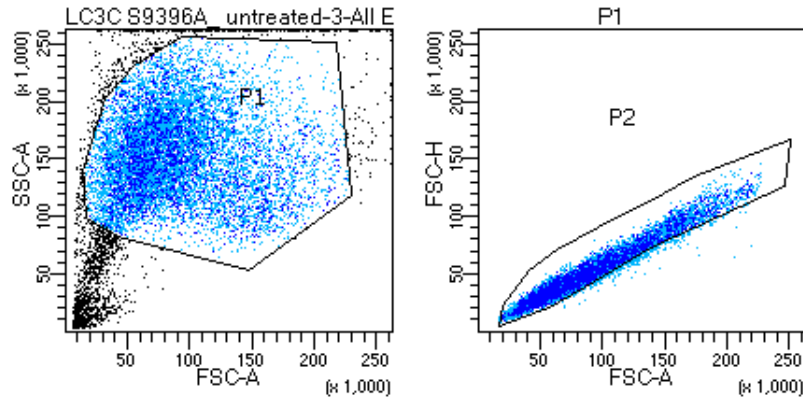

| Experiment Name: | 190806_LinaH            |         |              |                        |                      |
|------------------|-------------------------|---------|--------------|------------------------|----------------------|
| Specimen Name:   | LC3C S9396A_untreated   |         |              |                        |                      |
| Tube Name:       | 3                       |         |              |                        |                      |
| Record Date:     | Aug 6, 2019 10:19:38 AM |         |              |                        |                      |
| Population       | #Events                 | %Parent | %Grand Pa... | mCherry T...<br>Median | GFP FITC-A<br>Median |
| All Events       | 12,486                  | ####    | ####         | 23                     | 99                   |
| P1               | 10,573                  | 84.7    | ####         | 23                     | 97                   |
| P2               | 10,032                  | 94.9    | 80.3         | 23                     | 96                   |
| mCherry pos      | 1,969                   | 19.6    | 18.6         | 5,667                  | 18,639               |
| GFP pos          | 1,969                   | 100.0   | 19.6         | 5,667                  | 18,639               |

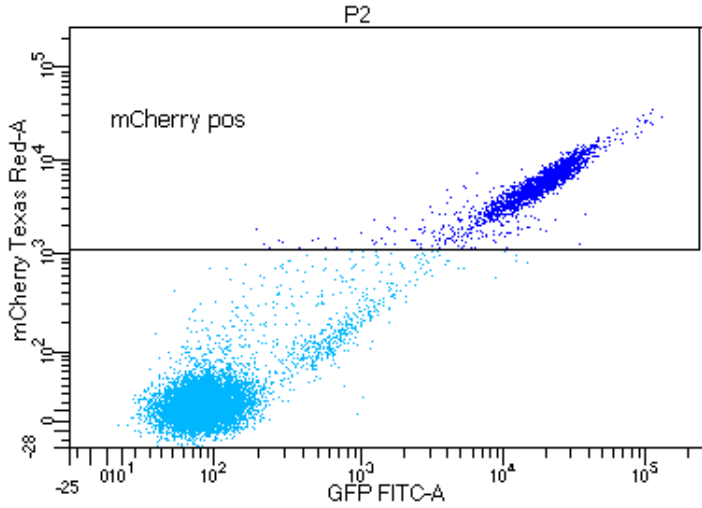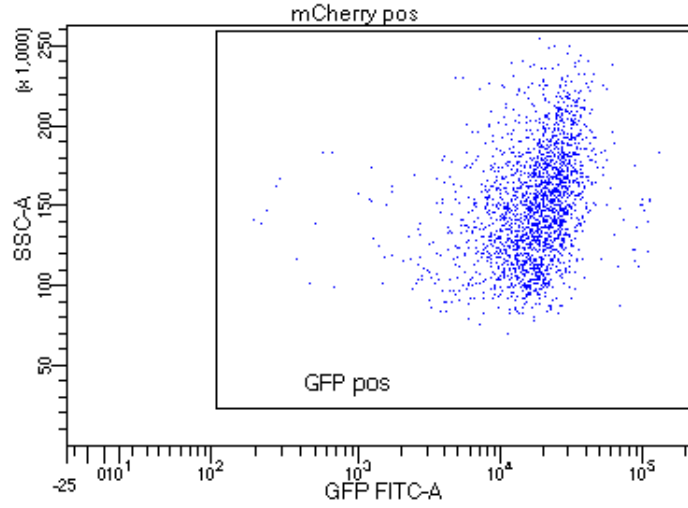

| Tube: 3     |         |         |        |
|-------------|---------|---------|--------|
| Population  | #Events | %Parent | %Total |
| All Events  | 12,486  | ####    | 100.0  |
| P1          | 10,573  | 84.7    | 84.7   |
| P2          | 10,032  | 94.9    | 80.3   |
| mCherry pos | 1,969   | 19.6    | 15.8   |
| GFP pos     | 1,969   | 100.0   | 15.8   |

190806\_LinaH

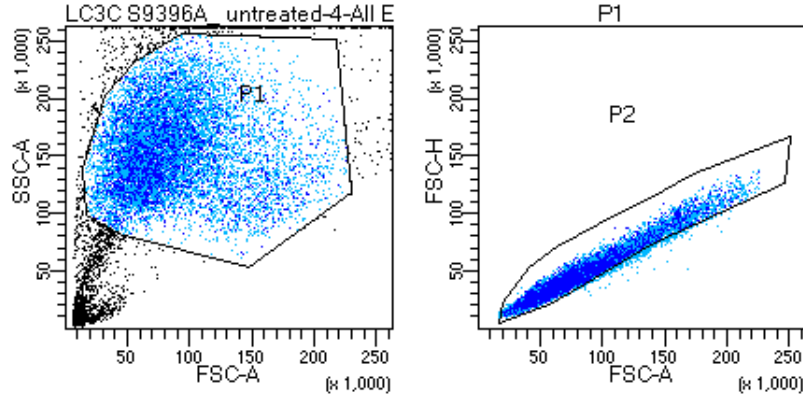

| Experiment Name: | 190806_LinaH            |         |              |                        |                      |
|------------------|-------------------------|---------|--------------|------------------------|----------------------|
| Specimen Name:   | LC3C S9396A_untreated   |         |              |                        |                      |
| Tube Name:       | 4                       |         |              |                        |                      |
| Record Date:     | Aug 6, 2019 10:20:46 AM |         |              |                        |                      |
| Population       | #Events                 | %Parent | %Grand Pa... | mCherry T...<br>Median | GFP FITC-A<br>Median |
| All Events       | 12,922                  | ####    | ####         | 23                     | 104                  |
| P1               | 10,924                  | 84.5    | ####         | 23                     | 102                  |
| P2               | 10,432                  | 95.5    | 80.7         | 23                     | 101                  |
| mCherry pos      | 2,113                   | 20.3    | 19.3         | 5,454                  | 18,093               |
| GFP pos          | 2,113                   | 100.0   | 20.3         | 5,454                  | 18,093               |

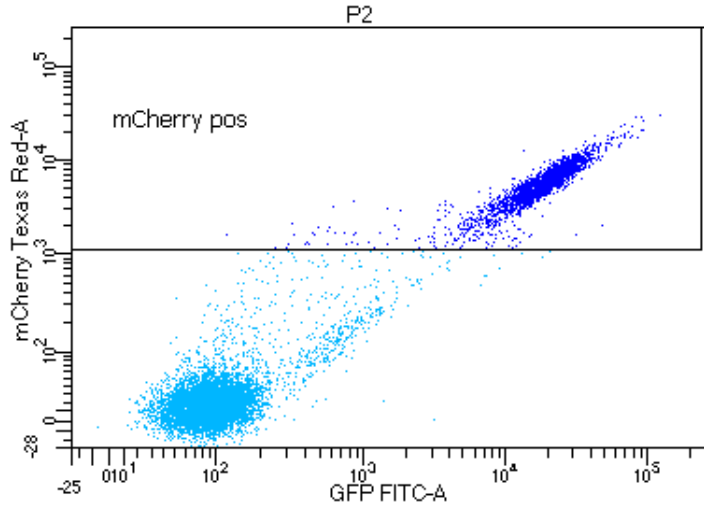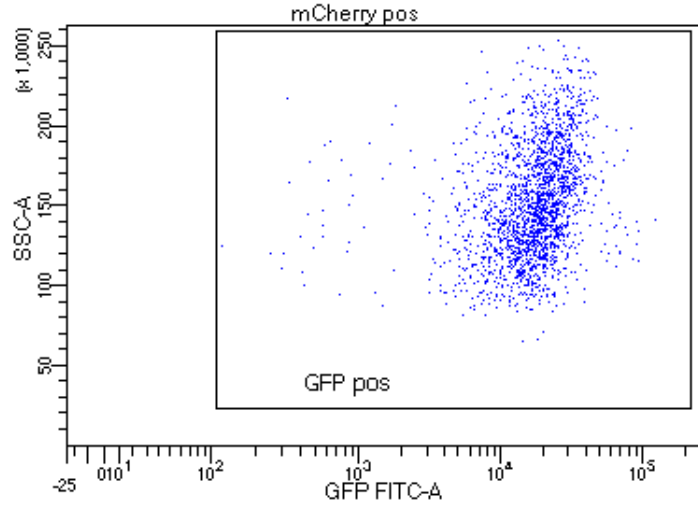

| Tube: 4     |         |         |        |
|-------------|---------|---------|--------|
| Population  | #Events | %Parent | %Total |
| All Events  | 12,922  | ####    | 100.0  |
| P1          | 10,924  | 84.5    | 84.5   |
| P2          | 10,432  | 95.5    | 80.7   |
| mCherry pos | 2,113   | 20.3    | 16.4   |
| GFP pos     | 2,113   | 100.0   | 16.4   |

190806\_LinaH

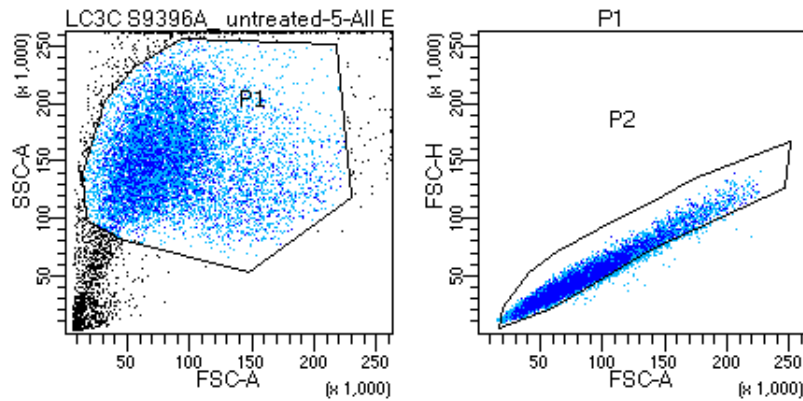

| Experiment Name: | 190806_LinaH            |         |              |                     |                   |
|------------------|-------------------------|---------|--------------|---------------------|-------------------|
| Specimen Name:   | LC3C S9396A_untreated   |         |              |                     |                   |
| Tube Name:       | 5                       |         |              |                     |                   |
| Record Date:     | Aug 6, 2019 10:21:49 AM |         |              |                     |                   |
| Population       | #Events                 | %Parent | %Grand Pa... | mCherry T... Median | GFP FITC-A Median |
| All Events       | 12,386                  | ####    | ####         | 22                  | 99                |
| P1               | 10,531                  | 85.0    | ####         | 22                  | 98                |
| P2               | 10,047                  | 95.4    | 81.1         | 21                  | 97                |
| mCherry pos      | 2,018                   | 20.1    | 19.2         | 5,459               | 18,294            |
| GFP pos          | 2,017                   | 100.0   | 20.1         | 5,459               | 18,295            |

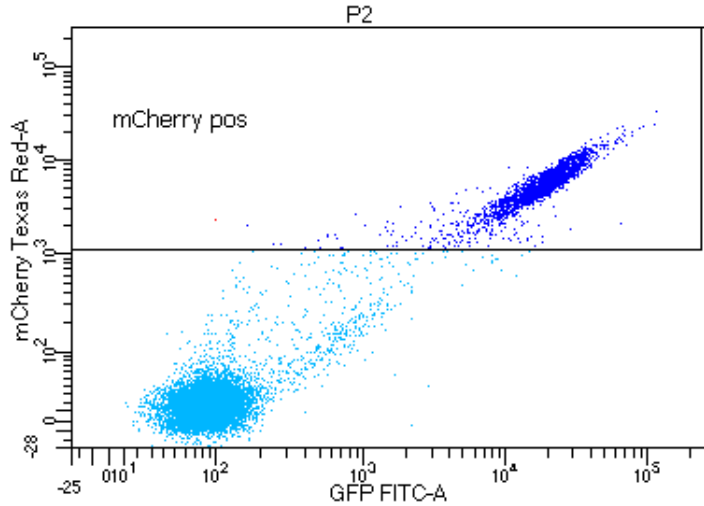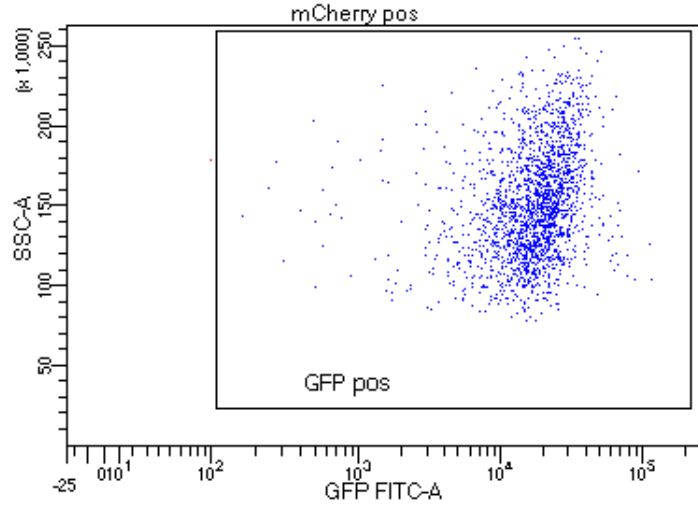

| Tube: 5     |         |         |        |
|-------------|---------|---------|--------|
| Population  | #Events | %Parent | %Total |
| All Events  | 12,386  | ####    | 100.0  |
| P1          | 10,531  | 85.0    | 85.0   |
| P2          | 10,047  | 95.4    | 81.1   |
| mCherry pos | 2,018   | 20.1    | 16.3   |
| GFP pos     | 2,017   | 100.0   | 16.3   |

190806\_LinaH

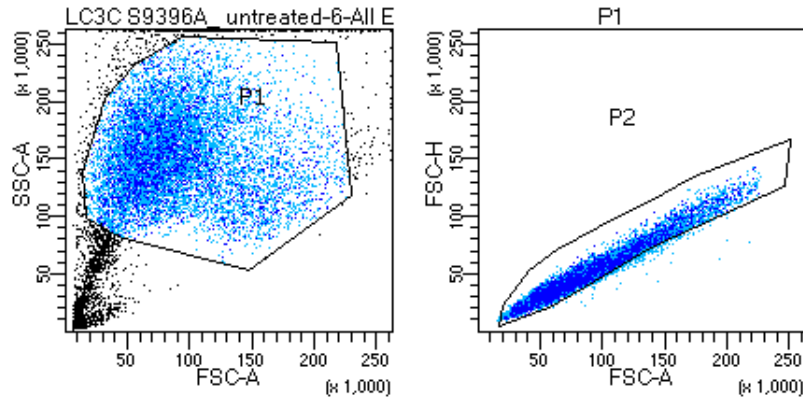

| Experiment Name: | 190806_LinaH            |         |              |                     |                   |
|------------------|-------------------------|---------|--------------|---------------------|-------------------|
| Specimen Name:   | LC3C S9396A_untreated   |         |              |                     |                   |
| Tube Name:       | 6                       |         |              |                     |                   |
| Record Date:     | Aug 6, 2019 10:22:49 AM |         |              |                     |                   |
| Population       | #Events                 | %Parent | %Grand Pa... | mCherry T... Median | GFP FITC-A Median |
| All Events       | 12,395                  | ####    | ####         | 24                  | 104               |
| P1               | 10,445                  | 84.3    | ####         | 23                  | 101               |
| P2               | 9,890                   | 94.7    | 79.8         | 23                  | 101               |
| mCherry pos      | 1,960                   | 19.8    | 18.8         | 5,532               | 18,050            |
| GFP pos          | 1,960                   | 100.0   | 19.8         | 5,532               | 18,050            |

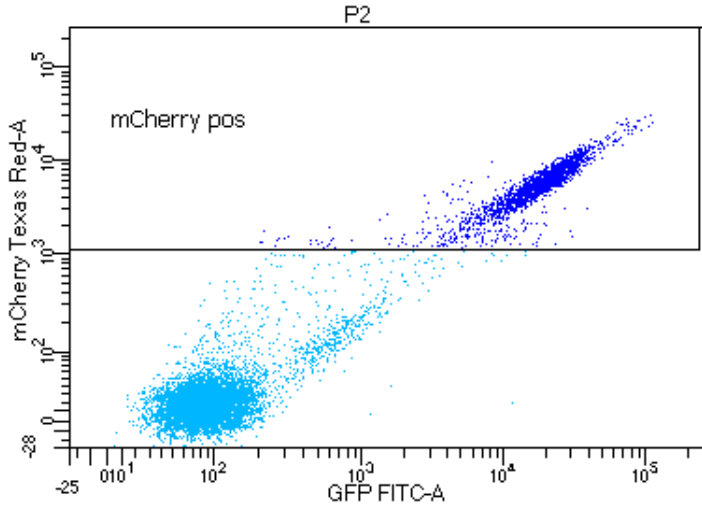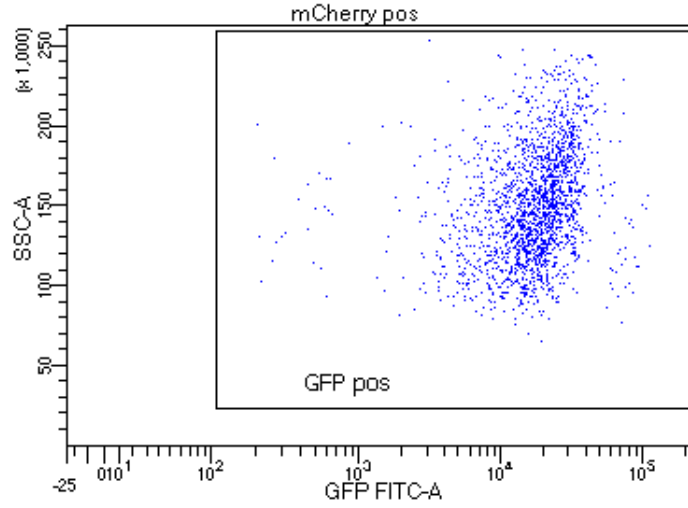

| Tube: 6     |         |         |        |
|-------------|---------|---------|--------|
| Population  | #Events | %Parent | %Total |
| All Events  | 12,395  | ####    | 100.0  |
| P1          | 10,445  | 84.3    | 84.3   |
| P2          | 9,890   | 94.7    | 79.8   |
| mCherry pos | 1,960   | 19.8    | 15.8   |
| GFP pos     | 1,960   | 100.0   | 15.8   |

190806\_LinaH

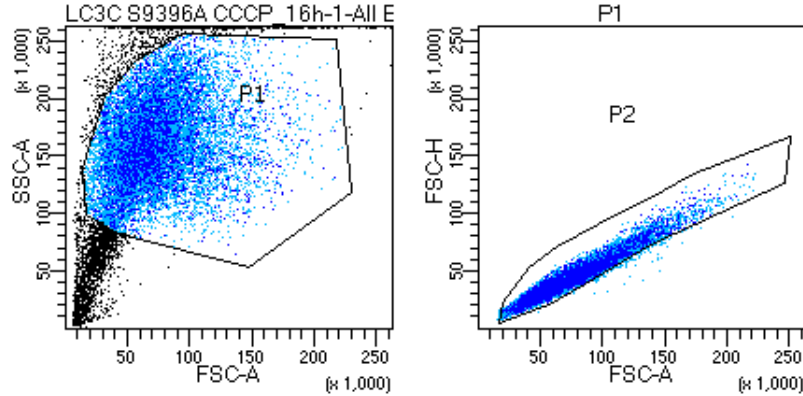

| Experiment Name: | 190806_LinaH            |         |              |                     |                   |
|------------------|-------------------------|---------|--------------|---------------------|-------------------|
| Specimen Name:   | LC3C S9396A CCCP_16h    |         |              |                     |                   |
| Tube Name:       | 1                       |         |              |                     |                   |
| Record Date:     | Aug 6, 2019 10:25:03 AM |         |              |                     |                   |
| Population       | #Events                 | %Parent | %Grand Pa... | mCherry T... Median | GFP FITC-A Median |
| All Events       | 18,450                  | ####    | ####         | 31                  | 89                |
| P1               | 15,547                  | 84.3    | ####         | 29                  | 85                |
| P2               | 15,293                  | 98.4    | 82.9         | 29                  | 84                |
| mCherry pos      | 2,937                   | 19.2    | 18.9         | 2,534               | 4,206             |
| GFP pos          | 2,937                   | 100.0   | 19.2         | 2,534               | 4,206             |

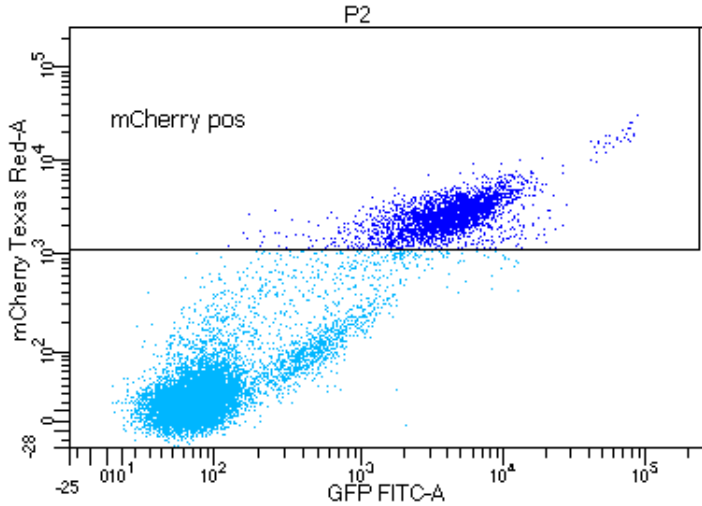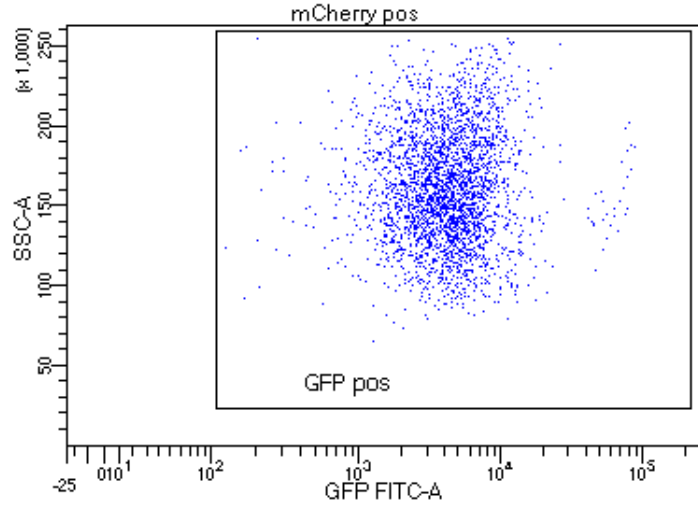

| Tube: 1     |         |         |        |
|-------------|---------|---------|--------|
| Population  | #Events | %Parent | %Total |
| All Events  | 18,450  | ####    | 100.0  |
| P1          | 15,547  | 84.3    | 84.3   |
| P2          | 15,293  | 98.4    | 82.9   |
| mCherry pos | 2,937   | 19.2    | 15.9   |
| GFP pos     | 2,937   | 100.0   | 15.9   |

190806\_LinaH

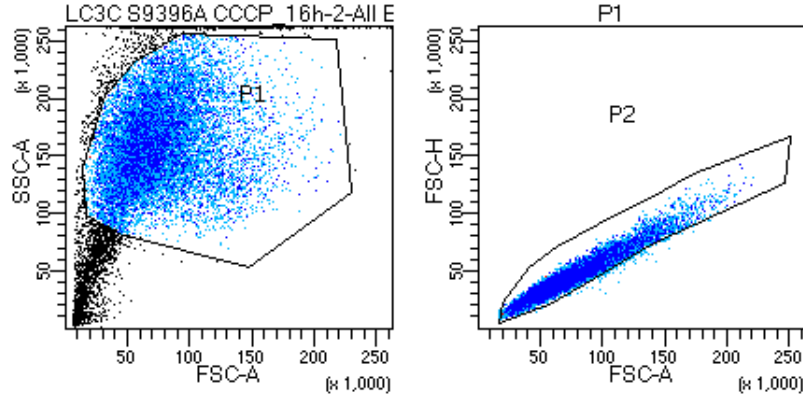

| Experiment Name: | 190806_LinaH            |         |              |                     |                   |
|------------------|-------------------------|---------|--------------|---------------------|-------------------|
| Specimen Name:   | LC3C S9396A CCCP_16h    |         |              |                     |                   |
| Tube Name:       | 2                       |         |              |                     |                   |
| Record Date:     | Aug 6, 2019 10:26:19 AM |         |              |                     |                   |
| Population       | #Events                 | %Parent | %Grand Pa... | mCherry T... Median | GFP FITC-A Median |
| All Events       | 17,151                  | ####    | ####         | 32                  | 88                |
| P1               | 14,578                  | 85.0    | ####         | 31                  | 85                |
| P2               | 14,346                  | 98.4    | 83.6         | 30                  | 84                |
| mCherry pos      | 2,791                   | 19.5    | 19.1         | 2,541               | 4,216             |
| GFP pos          | 2,789                   | 99.9    | 19.4         | 2,542               | 4,216             |

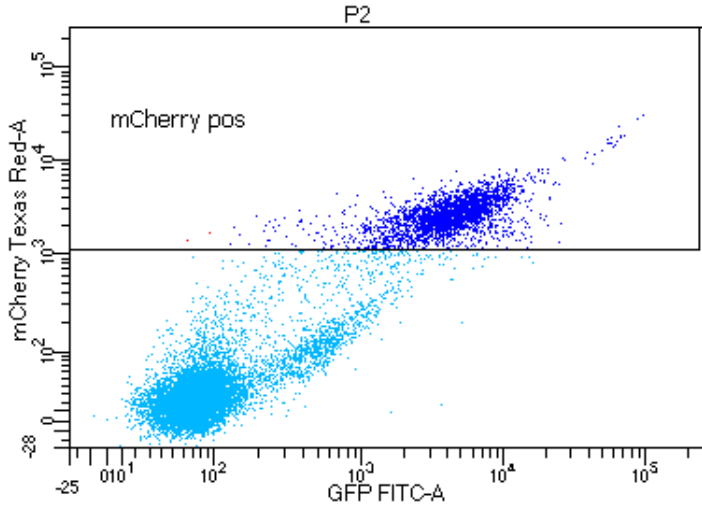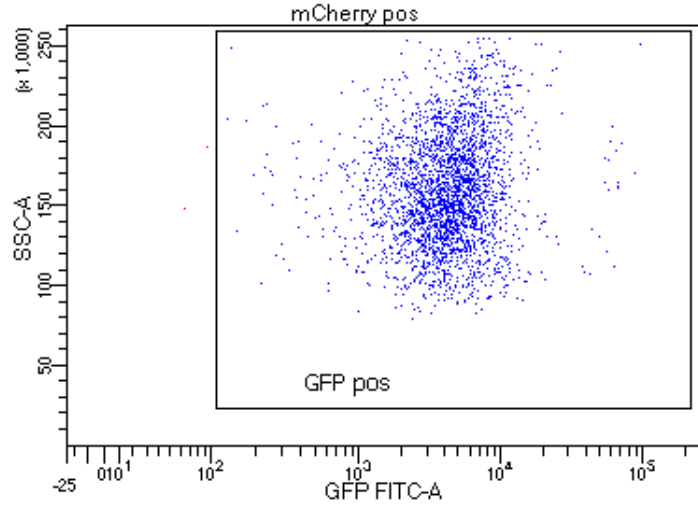

| Tube: 2     |         |         |        |
|-------------|---------|---------|--------|
| Population  | #Events | %Parent | %Total |
| All Events  | 17,151  | ####    | 100.0  |
| P1          | 14,578  | 85.0    | 85.0   |
| P2          | 14,346  | 98.4    | 83.6   |
| mCherry pos | 2,791   | 19.5    | 16.3   |
| GFP pos     | 2,789   | 99.9    | 16.3   |

190806\_LinaH

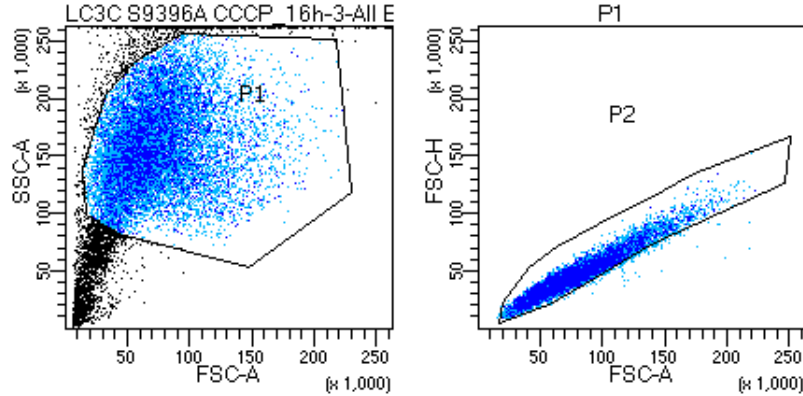

| Experiment Name: | 190806_LinaH            |         |              |                        |                      |
|------------------|-------------------------|---------|--------------|------------------------|----------------------|
| Specimen Name:   | LC3C S9396A CCCP_16h    |         |              |                        |                      |
| Tube Name:       | 3                       |         |              |                        |                      |
| Record Date:     | Aug 6, 2019 10:27:49 AM |         |              |                        |                      |
| Population       | #Events                 | %Parent | %Grand Pa... | mCherry T...<br>Median | GFP FITC-A<br>Median |
| All Events       | 17,642                  | ####    | ####         | 32                     | 91                   |
| P1               | 14,657                  | 83.1    | ####         | 30                     | 87                   |
| P2               | 14,385                  | 98.1    | 81.5         | 30                     | 86                   |
| mCherry pos      | 2,707                   | 18.8    | 18.5         | 2,436                  | 3,756                |
| GFP pos          | 2,707                   | 100.0   | 18.8         | 2,436                  | 3,756                |

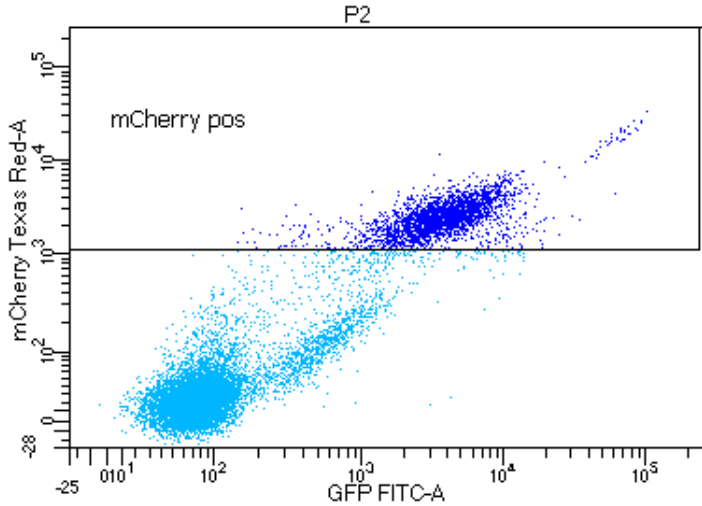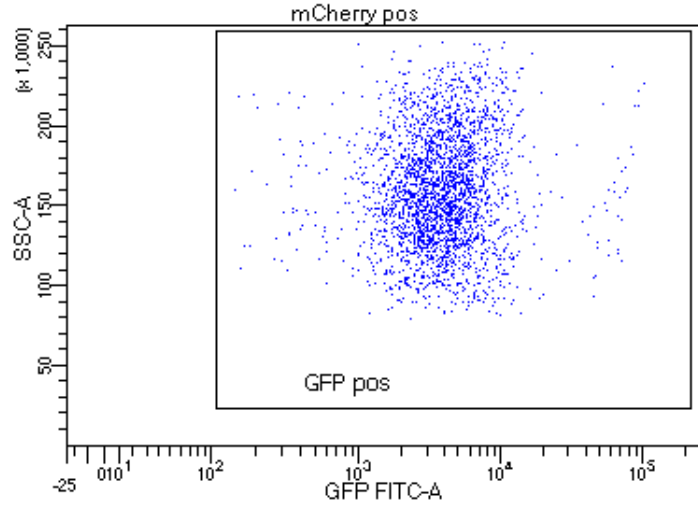

| Tube: 3     |         |         |        |
|-------------|---------|---------|--------|
| Population  | #Events | %Parent | %Total |
| All Events  | 17,642  | ####    | 100.0  |
| P1          | 14,657  | 83.1    | 83.1   |
| P2          | 14,385  | 98.1    | 81.5   |
| mCherry pos | 2,707   | 18.8    | 15.3   |
| GFP pos     | 2,707   | 100.0   | 15.3   |



190806\_LinaH

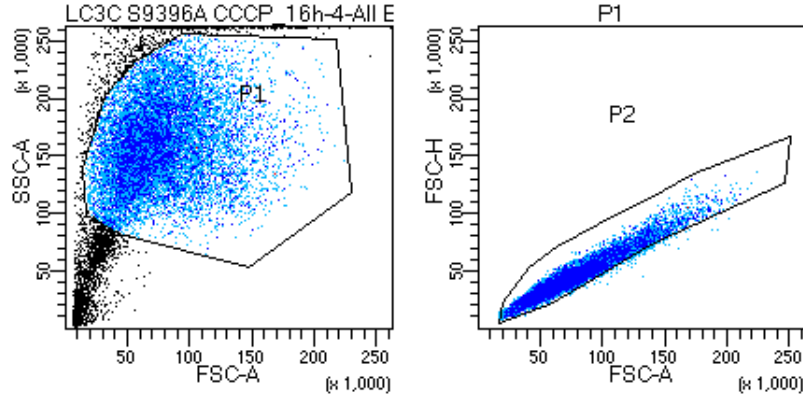

| Experiment Name: | 190806_LinaH            |         |              |                     |                   |
|------------------|-------------------------|---------|--------------|---------------------|-------------------|
| Specimen Name:   | LC3C S9396A CCCP_16h    |         |              |                     |                   |
| Tube Name:       | 4                       |         |              |                     |                   |
| Record Date:     | Aug 6, 2019 10:29:20 AM |         |              |                     |                   |
| Population       | #Events                 | %Parent | %Grand Pa... | mCherry T... Median | GFP FITC-A Median |
| All Events       | 16,547                  | ####    | ####         | 30                  | 86                |
| P1               | 14,023                  | 84.7    | ####         | 29                  | 83                |
| P2               | 13,756                  | 98.1    | 83.1         | 29                  | 82                |
| mCherry pos      | 2,663                   | 19.4    | 19.0         | 2,517               | 4,235             |
| GFP pos          | 2,660                   | 99.9    | 19.3         | 2,517               | 4,239             |

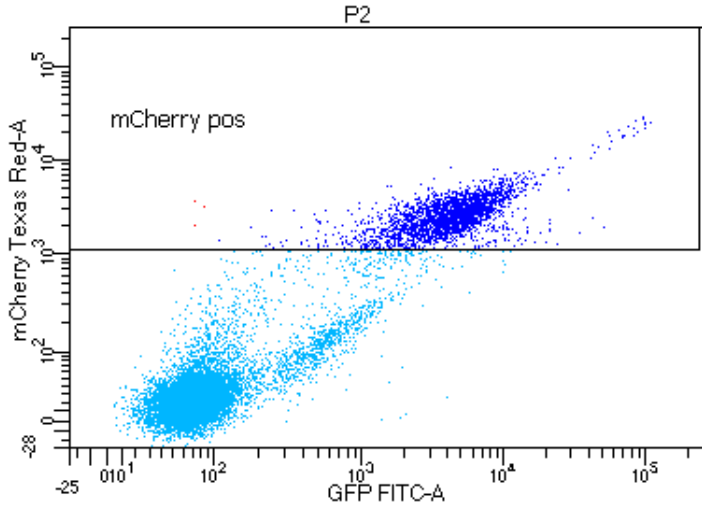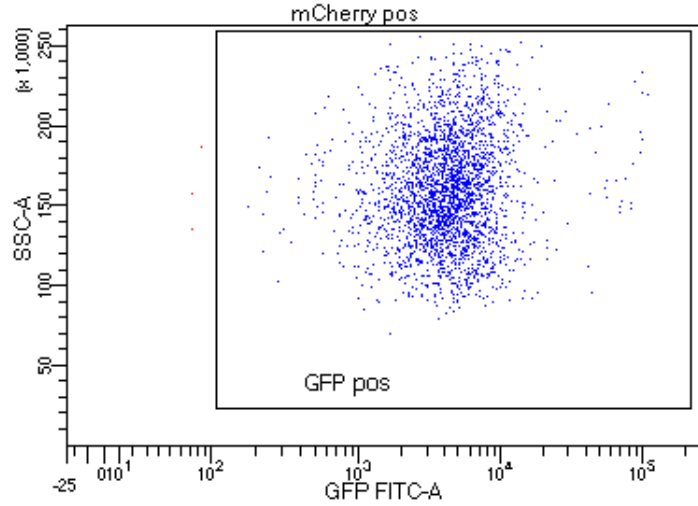

| Tube: 4     |         |         |        |
|-------------|---------|---------|--------|
| Population  | #Events | %Parent | %Total |
| All Events  | 16,547  | ####    | 100.0  |
| P1          | 14,023  | 84.7    | 84.7   |
| P2          | 13,756  | 98.1    | 83.1   |
| mCherry pos | 2,663   | 19.4    | 16.1   |
| GFP pos     | 2,660   | 99.9    | 16.1   |

190806\_LinaH

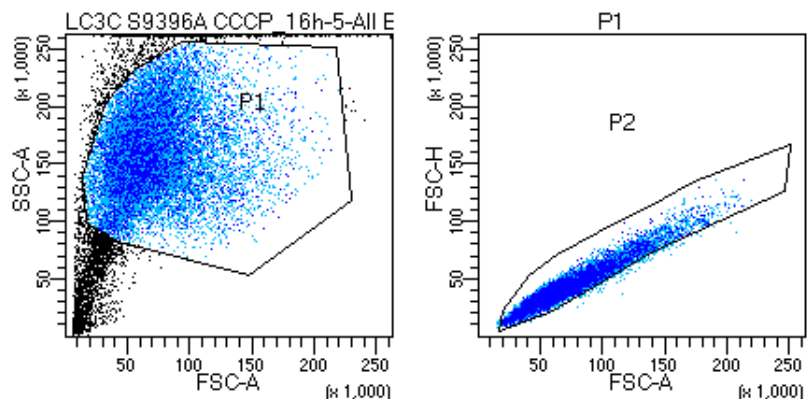

Experiment Name: 190806\_LinaH  
 Specimen Name: LC3C S9396A CCCP\_16h  
 Tube Name: 5  
 Record Date: Aug 6, 2019 10:31:08 AM

| Population  | #Events | %Parent | %Grand Pa... | mCherry T... Median | GFP FITC-A Median |
|-------------|---------|---------|--------------|---------------------|-------------------|
| All Events  | 19,244  | ####    | ####         | 31                  | 88                |
| P1          | 16,084  | 83.6    | ####         | 30                  | 85                |
| P2          | 15,813  | 98.3    | 82.2         | 29                  | 84                |
| mCherry pos | 2,954   | 18.7    | 18.4         | 2,428               | 3,581             |
| GFP pos     | 2,954   | 100.0   | 18.7         | 2,428               | 3,581             |

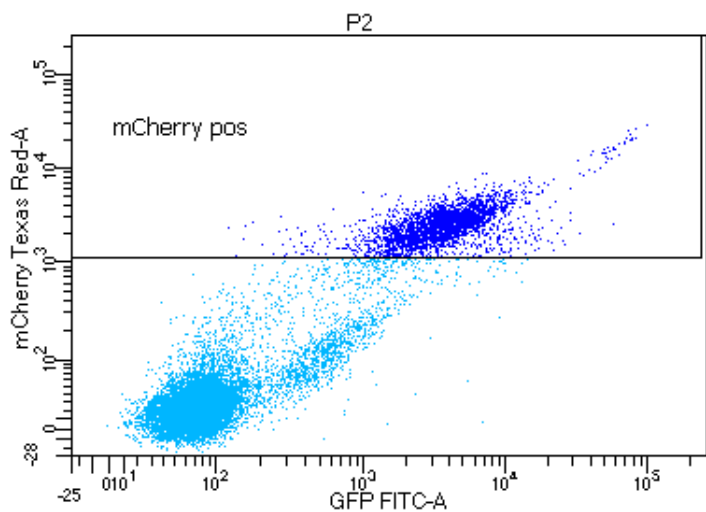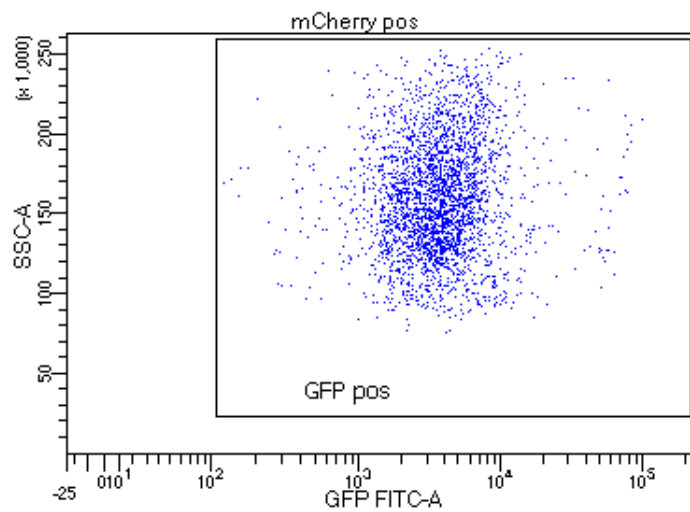

Tube: 5

| Population  | #Events | %Parent | %Total |
|-------------|---------|---------|--------|
| All Events  | 19,244  | ####    | 100.0  |
| P1          | 16,084  | 83.6    | 83.6   |
| P2          | 15,813  | 98.3    | 82.2   |
| mCherry pos | 2,954   | 18.7    | 15.4   |
| GFP pos     | 2,954   | 100.0   | 15.4   |

190806\_LinaH

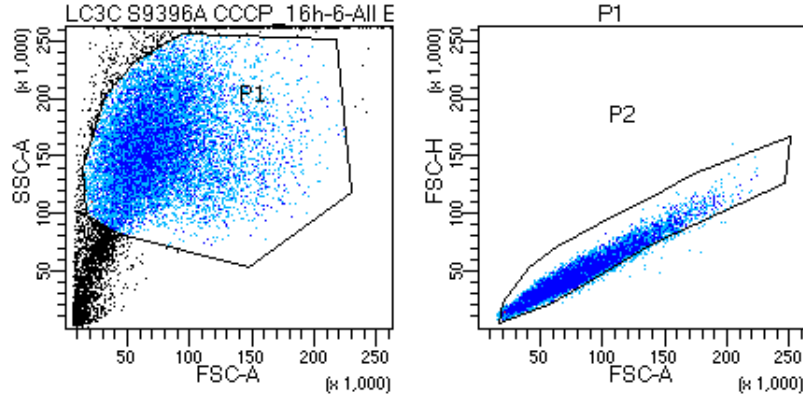

| Experiment Name: | 190806_LinaH            |         |              |                        |                      |
|------------------|-------------------------|---------|--------------|------------------------|----------------------|
| Specimen Name:   | LC3C S9396A CCCP_16h    |         |              |                        |                      |
| Tube Name:       | 6                       |         |              |                        |                      |
| Record Date:     | Aug 6, 2019 10:32:55 AM |         |              |                        |                      |
| Population       | #Events                 | %Parent | %Grand Pa... | mCherry T...<br>Median | GFP FITC-A<br>Median |
| All Events       | 17,376                  | ####    | ####         | 31                     | 90                   |
| P1               | 14,004                  | 80.6    | ####         | 31                     | 87                   |
| P2               | 13,708                  | 97.9    | 78.9         | 30                     | 86                   |
| mCherry pos      | 2,612                   | 19.1    | 18.7         | 2,472                  | 3,899                |
| GFP pos          | 2,611                   | 100.0   | 19.0         | 2,472                  | 3,899                |

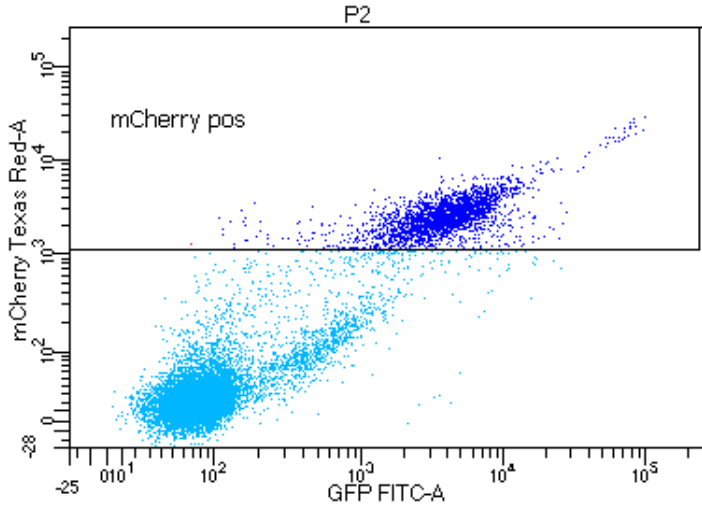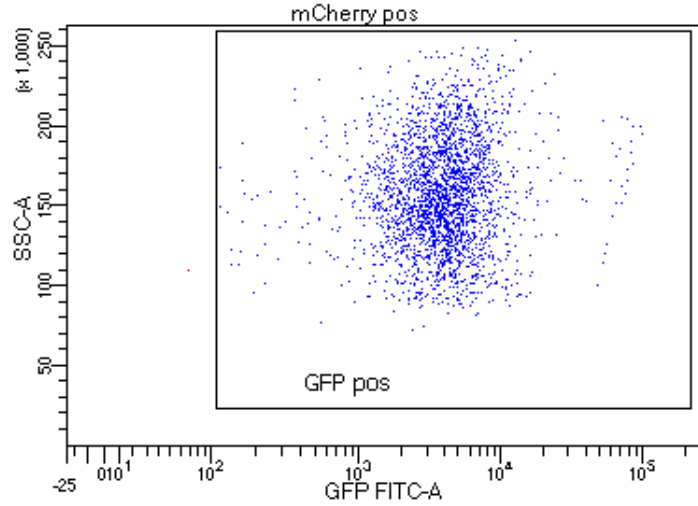

| Tube: 6     |         |         |        |
|-------------|---------|---------|--------|
| Population  | #Events | %Parent | %Total |
| All Events  | 17,376  | ####    | 100.0  |
| P1          | 14,004  | 80.6    | 80.6   |
| P2          | 13,708  | 97.9    | 78.9   |
| mCherry pos | 2,612   | 19.1    | 15.0   |
| GFP pos     | 2,611   | 100.0   | 15.0   |
